# Supplementary material for: Comparative effectiveness of telemedicine strategies on type 2 diabetes management: A systematic review and network meta-analysis
Source: PubMed Central journal article supplement (PMC5627243; doi:10.1038/s41598-017-12987-z), 2017-10-04
Supplement: 41598_2017_12987_MOESM1_ESM.pdf [file 41598_2017_12987_MOESM1_ESM.pdf]

# Comparative effectiveness of telemedicine strategies on type 2 diabetes management: A systematic review and network meta-analysis

Shaun Wen Huey Lee, Carina Ka Yee Chan, Siew Siang Chua, Nathorn  
Chaiyakunapruk

## Supplementary Online Content

|             |                                                                                                                         |
|-------------|-------------------------------------------------------------------------------------------------------------------------|
| Table S1    | Literature search strategy                                                                                              |
| Table S2    | Description of interventions and outcomes                                                                               |
| Table S3    | Selected baseline demographics and details of intervention strategies employed                                          |
| Table S4    | Key intervention component of studies included in the current review                                                    |
| Table S5    | Details of educational content delivered to participants in studies examining teleeducation                             |
| Table S6    | Details of self-monitoring frequency and recommended schedule                                                           |
| Table S7    | Details of the action(s) taken based upon results from glucose monitoring                                               |
| Table S8    | Results of subgroup and sensitivity analysis for primary outcome                                                        |
| Table S9    | Results of the network meta-analyses                                                                                    |
| Table S10   | Inconsistency estimates                                                                                                 |
| Table S11   | Summary of effect sizes comparing meta-analysis from other studies and current study                                    |
| Figure S1   | Flow chart depicts the process of study selection                                                                       |
| Figure S2   | Risk of bias assessment appraisal of randomized controlled studies on telemedicine using the Cochrane risk of bias tool |
| Figure S3   | Evidence network for outcomes assessed                                                                                  |
| Figure S4   | Surface under curve ranking                                                                                             |
| Figure S5   | Comparison adjusted funnel plot                                                                                         |
| eReferences | List of studies included in the current review                                                                          |

## Table S1 Literature search strategy

We searched MEDLINE using the algorithm listed below. The algorithm was adjusted to also search the Cochrane Library, EMBASE, PsycINFO, Web of Science and CINAHL databases. This was supplemented by a search of grey literature in International Pharmaceutical Abstracts, Australasian Digital Theses Program, Aslib Index to Theses and ProQuest Digital Dissertation, and Theses.

Database: Ovid MEDLINE® <1970 to September Week 4 2016> Search Strategy:

1. exp diabetes mellitus, type 2
2. NIDDM.mp
3. T2DM.mp
4. non insulin\* depend\*.mp
5. noninsulin\* depend\*.mp
6. non insulin depend\*.mp
7. noninsulin depend\*.mp
8. #1 OR #2 OR #3 OR #4 OR #5 OR #6 OR #7
9. Telehealth.mp
10. telemedicine.mp
11. telemonitoring.mp
12. telecare.mp
13. telematics.mp
14. telehomecare.mp
15. mobile health.mp
16. remote monitoring.mp
17. #9 OR #10 OR #11 OR #12 OR #13 OR #14 OR #15 OR #16
18. remote consultation.mp
19. sms.mp
20. short messaging system.mp
21. video monitoring.mp
22. internet monitoring.mp
23. internet consultation.mp
24. video consultation.mp
25. telephone.mp
26. smartphone.mp
27. cellular phone.mp
28. mobile phone.mp
29. telephone support.mp
30. #18 OR #19 OR #20 OR #21 OR #22 OR #23 OR #24 OR #25 OR #26 OR #27 OR #28 OR #29
31. Randomized controlled trial.mp
32. randomized controlled study.mp
33. clinical trials.mp
34. prospective\*.mp
35. #31 OR #32 OR #33 OR #34
36. #8 AND #17
37. #30 AND #36
38. #35 AND #37

**Table S2****Description of content of interventions and outcomes**

Studies were coded to determine the strategies used in the intervention and control groups. These are broadly categorized as follow:-

1. Individualized care plan – Use of a specific structured algorithm to identify and individualize treatment / care to the patient
2. Audit & Feedback – Evidence of providing feedback based upon patient reported results. Feedback provided to the patient can include communication (both, 1-way or 2-way) or shared decision making strategies between patient and provider to implement plan
3. Psychology based counselling – Any intervention which aims to modify behavior, belief and perceptions of the patient
4. Skill building - Use of any intervention that explicitly aims to educate and develop skills which focuses to promote a change in behavioral domains relevant to diabetes
5. Financial incentive – Use of incentives to patient as a motivation to improve diabetes care (eg. attendance at scheduled visits, compliance to medications, meeting target glycaemic goals)
6. Peer / Family support – Intervention which involves someone / family member with diabetes who is adherent to treatment and lifestyle guideline, to provide support, set goals or formulate plans to maintain self-care behaviors over time.
7. Theory based counselling – Any educational intervention (including self-management, self-monitoring of blood glucose and/or behavior change) described for participants.
8. Lay health advisor – An intervention which trains community members to target diabetes patients and in some cases, known and trusted members of the community.

**Table S3: Selected baseline demographics and details of intervention strategies employed**

| Author, Year (Country)                  | Comparison group                                                                                      | Key elements of intervention                                                                                                                                                 | Sample size, n | Age, yrs | Men, No (%) | Medium used for intervention | Frequency of intervention and duration      | Intervention team | Psychological model used in intervention          |
|-----------------------------------------|-------------------------------------------------------------------------------------------------------|------------------------------------------------------------------------------------------------------------------------------------------------------------------------------|----------------|----------|-------------|------------------------------|---------------------------------------------|-------------------|---------------------------------------------------|
| <b>Articles examining teleeducation</b> |                                                                                                       |                                                                                                                                                                              |                |          |             |                              |                                             |                   |                                                   |
| Arora, 2014 (USA)                       | Usual care                                                                                            | Two daily educational text message over 6 months on promoting health behaviour                                                                                               | 128            | 51       | 83 (65)     | SMS                          | 2 text messages daily; 6 months             | NR                | Educational, Behavioural                          |
| Avdal, 2011 (Turkey)                    | Basic diabetes education in polyclinic                                                                | Web-based diabetes education                                                                                                                                                 | 122            | 52       | 60 (49)     | Internet                     | NR                                          | DE                | Educational, Behavioural                          |
| Bell, 2012 (USA)                        | Usual care                                                                                            | 30-60 seconds video message sent daily to mobile phone over 6 months on self- efficacy management and education topics outline by American Association of Diabetes Educators | 64             | 58       | 35 (55)     | Mobile phone                 | 30-60 seconds video message daily; 6 months | RN                | Educational, Behavioural, Cognitive, Psychosocial |
| Blackberry, 2013 (Australia)            | Standard diabetes care including referrals to diabetic educators, dieticians and diabetes specialists | Nine structured patient coaching on diabetes self-management including lifestyle issues, medication adherence and dosing and self-monitoring                                 | 473            | 63       | 270 (57)    | Telephone                    | 9 sessions; 15 months                       | RN                | Educational, Behavioural                          |
| Bond, 2007 (USA)                        | Usual care                                                                                            | Weekly messages on behavioral and motivational strategies                                                                                                                    | 62             | NR       | 34 (55)     | Internet                     | Weekly; 6 months                            | RN                | Educational, Behavioural, Cognitive               |

|                        |                                                                                               |                                                                                                                                                                                                                                         |     |    |          |               |                             |               |                                                   |
|------------------------|-----------------------------------------------------------------------------------------------|-----------------------------------------------------------------------------------------------------------------------------------------------------------------------------------------------------------------------------------------|-----|----|----------|---------------|-----------------------------|---------------|---------------------------------------------------|
|                        |                                                                                               | and cues to improve diabetes self-management and change personal behavior                                                                                                                                                               |     |    |          |               |                             |               |                                                   |
| Browning, 2016 (China) | Usual medical care but medical fees payment waived                                            | Coach led motivational health coaching. Higher intensity at the beginning of study                                                                                                                                                      | 711 | 64 | 336 (47) | Telephone     | 4 calls; 12 months          | RN            | Educational, Cognitive                            |
| Capozza, 2015 (USA)    | Usual care                                                                                    | Daily education messages (1-7 messages) related to diabetes and health improvement                                                                                                                                                      | 93  | 50 | 34 (37)  | SMS           | Daily; 6 months             | NR            | Educational                                       |
| Davis, 2010 (USA)      | Usual care with one 20-minute education session                                               | Interactive patient education comprising on 13 modules on self-management support                                                                                                                                                       | 165 | 60 | 42 (26)  | VC, Telephone | 13 sessions; 12 months      | DE, Dietician | Educational, Behavioural                          |
| Glasgow, 1997 (USA)    | Usual care with quarterly follow-up on microvascular and macrovascular risk factor assessment | Computer generated individualized goal setting plan with follow up. Patients with high self-efficacy levels received a self-review video while those with lower self-efficacy had a 30 minute interactive video and telephone follow-up | 206 | 62 | 79 (38)  | Computer      | 2 telephone calls; 6 months | NR            | Educational, Behavioural                          |
| Glasgow, 2006 (USA)    | Usual care by physician supplemented with a generic health-risk appraisal                     | Computer assisted patient education focusing on healthy eating and physical activity with a tailored follow up letter                                                                                                                   | 335 | 62 | 168 (50) | Computer      | 2 sessions; 1 month         | Peer support  | Educational, Behavioural, Cognitive, Psychosocial |

|                       |                                                        |                                                                                                                                                                       |     |    |          |           |                       |               |                                     |
|-----------------------|--------------------------------------------------------|-----------------------------------------------------------------------------------------------------------------------------------------------------------------------|-----|----|----------|-----------|-----------------------|---------------|-------------------------------------|
| Goodarzi, 2012 (Iran) | Usual care                                             | Four educational messages weekly focusing on diet, exercise and medications delivered by SMS over 12 weeks                                                            | 81  | 54 | 18 (22)  | SMS       | 48 messages; 3 months | NR            | Educational, Psychosocial           |
| Graziano, 2009 (USA)  | Usual care which include clinic visit every 2-3 months | Daily automated pre-recorded voice-message over 3 months focusing on behaviors, attitude, beliefs and reduction of barriers related to performing self-care behavior. | 119 | 62 | 66 (55)  | Telephone | Daily; 3 months       | DE            | Financial, Educational, Behavioural |
| Islam, 2015 (USA)     | Usual care                                             | 90 SMS educational messages for 6 months based upon behavioural learning theory and transtheoretical model of behavioural change                                      | 236 | 48 | 108 (46) | SMS       | 6 months              | NR            | Educational, Behavioural            |
| Kim, 2003 (Korea)     | Usual care                                             | 16 telephone calls over 12 weeks educating patient and reinforcement of lifestyle changes                                                                             | 36  | 60 | 11 (31)  | Telephone | 16 calls; 3 months    | RN, Dietician | Educational, Behavioural            |
| Lee, 2007 (Taiwan)    | Usual care supplemented with patient education         | An integrated web-based patient information system which can deliver patient educational messages on disease management and skill-building                            | 274 | 58 | 141 (51) | Internet  | NR                    | NR            | Educational, Behavioural            |
| Leu, 2005 (USA)       | Usual care                                             | Automated system which delivers health-related messages (dietary, exercise, meal-time reinforcements) as well as                                                      | 50  | NR | NR       | Pager     | NR                    | NR            | Educational                         |

|                     |                                                           |                                                                                                                 |     |    |          |           |                                                          |      |                                                   |
|---------------------|-----------------------------------------------------------|-----------------------------------------------------------------------------------------------------------------|-----|----|----------|-----------|----------------------------------------------------------|------|---------------------------------------------------|
|                     |                                                           | medication and appointment reminders                                                                            |     |    |          |           |                                                          |      |                                                   |
| Liou, 2014 (Taiwan) | Usual care with one individual diabetes education session | Six monthly session on and patient education on diet, medication, stress management, goal setting and foot care | 95  | 57 | 48 (51)  | VC        | 6 sessions; 6 months                                     | NR   | Educational                                       |
| Lorig, 2008 (USA)   | Usual care                                                | Fifteen automated telephone delivered diabetes self- management education (90 second vignette each)             | 417 | 53 | 159 (38) | Telephone | 15 sessions; 18 months                                   | Peer | Educational, Behavioural                          |
| McKay, 2002 (USA)   | Usual care with information provided via internet         | Twice weekly personalized diabetes self-management coaching over 3 months to reach dietary goal                 | 160 | 60 | 75 (47)  | Internet  | Up to 2 contacts per week; 3 months                      | None | Educational, Behavioural                          |
|                     |                                                           | Online peer support system to exchange diabetes-related information, coping strategies and emotional support    |     |    |          | Internet  | Live chat forum; 3 months                                | Peer | Educational, Behavioural, Psychosocial            |
|                     |                                                           | Combination of diabetes self-management and peer support                                                        |     |    |          | Internet  | Up to 2 contacts per week with live chat forum; 3 months | Peer | Educational, Behavioural, Cognitive, Psychosocial |
| Noh, 2010 (Korea)   | Usual care                                                | Web-based education on diet, hypoglycaemic symptoms, diabetes and stress management                             | 40  | 42 | 31 (78)  | Internet  | Every two months                                         | NR   | Educational                                       |



|                           |                                                                             |                                                                                                                                                                                          |     |    |          |           |                                                              |      |                                                   |
|---------------------------|-----------------------------------------------------------------------------|------------------------------------------------------------------------------------------------------------------------------------------------------------------------------------------|-----|----|----------|-----------|--------------------------------------------------------------|------|---------------------------------------------------|
| Peimani, 2016             | Usual care                                                                  | General educational message on diabetes self-care                                                                                                                                        | 150 | 53 | 81 (54)  | SMS       | 7 messages a week; 3 months                                  | NR   | Educational, Cognitive                            |
|                           |                                                                             | Tailored educational messages on adherence and self-care based upon barriers identified                                                                                                  |     |    |          | SMS       | 7 messages a week; 3 months                                  |      | Educational, Cognitive                            |
| Piette, 2011 (USA)        | Usual care                                                                  | 12-weekly session with 9 monthly booster session of cognitive behavioural therapy module delivered by telephone focusing on depressive symptoms, self-management and physical activities | 291 | 56 | 144 (50) | Telephone | 21 sessions; 12 months                                       | RN   | Educational, Behavioural, Cognitive, Psychosocial |
| Plotnikoff, 2013 (Canada) | Usual care with standard print educational materials                        | Patient education (print materials) with pedometer                                                                                                                                       | 287 | 62 | 155 (54) | NA        | Mailed print material every 3 months; 12 months              | NR   | Educational,                                      |
|                           |                                                                             | Patient education with print materials, pedometer and counselling                                                                                                                        |     |    |          | Telephone | 16 calls; 12 months                                          | NR   | Educational, Cognitive, Psychosocial              |
| Sacco, 2009 (USA)         | Usual care                                                                  | Regular telephone delivered coaching and education on self-management by paraprofessionals                                                                                               | 62  | NR | NR       | Telephone | 18 sessions; 6 months                                        | Peer | Educational, Behavioural, Cognitive, Psychosocial |
| Shetty, 2011 (India)      | Standard care including appropriate drug therapy, laboratory investigations | Reminder once every 3 days on dietary modification, physical activity and drug schedules                                                                                                 | 215 | 50 | NR       | SMS       | Every 3 days for 12 months with clinic visits every 3 months | NR   | Educational, Behavioural                          |

|                            |                                                                     |                                                                                                                                                                                   |     |    |         |           |                              |                         |                                                   |
|----------------------------|---------------------------------------------------------------------|-----------------------------------------------------------------------------------------------------------------------------------------------------------------------------------|-----|----|---------|-----------|------------------------------|-------------------------|---------------------------------------------------|
|                            | and advice on diet modification and physical activity               |                                                                                                                                                                                   |     |    |         |           |                              |                         |                                                   |
| Whittemore, 2004 (USA)     | Usual care                                                          | Five individualized session and 2 follow-up calls by nurses over 6 months. Coaching session involve educational, behavioral, and affective strategies.                            | 49  | NR | NR      | Telephone | 8 sessions; 6 months         | RN                      | Educational, Behavioural, Cognitive               |
| Williams, 2012 (Australia) | Usual care with quarterly newsletter on health information          | Weekly automated interactive telephone call system to improve self-management behaviours over 6 months. Each call last between 5-20 minutes.                                      | 120 | 57 | 75 (63) | Telephone | Weekly; 6 months             | NR                      | Educational, Behavioural                          |
| Wolever, 2010 (USA)        | Usual care                                                          | Integrated health coaching on psychosocial, behavioural and glycaemic control 14 times over 6 months. Each session lasts 30 minutes.                                              | 56  | 53 | 13 (23) | Telephone | 13 telephone calls; 6 months | Psychologist            | Educational, Behavioural, Cognitive, Psychosocial |
| Yoon, 2008 (Korea)         | Usual care supplemented with patient education during clinic visits | Educational messages sent by SMS to patients on self-monitoring and medications weekly. Patients could also review information electronically and receive recommendations online. | 51  | 47 | 22 (43) | SMS       | 52 times; 12 months          | RN, DE, Endocrinologist | Educational, Behavioural, Psychosocial            |

|                                               |                                                                                                                           |                                                                                                                                                                                                                                                                                          |     |    |          |           |                                               |        |                                        |
|-----------------------------------------------|---------------------------------------------------------------------------------------------------------------------------|------------------------------------------------------------------------------------------------------------------------------------------------------------------------------------------------------------------------------------------------------------------------------------------|-----|----|----------|-----------|-----------------------------------------------|--------|----------------------------------------|
| Zolfaghari, 2011 (Iran)                       | Four educational messages weekly covering topics such as diet, exercise, medication and glucose monitoring over 12 weeks. | Patient self-efficacy education and counselling by telephone on similar topics in SMS group. Frequency was twice a week for first month, then weekly for months 2 & 3.                                                                                                                   | 77  | 52 | 36 (47)  | Telephone | 16 calls; 3 months                            | NR     | Educational, Behavioural, Psychosocial |
| <b>Articles examining telecase-management</b> |                                                                                                                           |                                                                                                                                                                                                                                                                                          |     |    |          |           |                                               |        |                                        |
| Anderson, 2011 (USA)                          | Usual care                                                                                                                | Semi-structured telephone disease management between clinic visits. Calls were weekly, biweekly or monthly and focused on clinical assessments, self-management, adherence and glucose monitoring.                                                                                       | 295 | NR | 124 (42) | Telephone | Variable depending on HbA1c levels; 12 months | RN     | Educational, Behavioural               |
| Aubert, 1998 (USA)                            | Usual care with diabetes education                                                                                        | Coordinated nurse care management of diabetes based on 6 step algorithm to improve glycemic control through medication adjustment and lifestyle changes. Nurse case manager met with family medicine physician and endocrinologist biweekly to review patient progress and other issues. | 138 | NR | 55 (40)  | Telephone | Biweekly telephone calls; 12 months           | RN, DE | Educational, Behavioural, Cognitive    |
| Glasgow, 2010                                 | Enhanced usual care                                                                                                       | Computer assisted web-based self-management (CASM) which                                                                                                                                                                                                                                 | 463 | 58 | 232 (50) | Computer  | Weekly feedback; 4 months                     | NR     | Educational, Behavioural               |

|                         |                                |                                                                                                                                                                                                                       |     |    |          |                     |                                                     |               |                                        |
|-------------------------|--------------------------------|-----------------------------------------------------------------------------------------------------------------------------------------------------------------------------------------------------------------------|-----|----|----------|---------------------|-----------------------------------------------------|---------------|----------------------------------------|
| (USA)                   |                                | participants selected treatment goals and monitored progress. Participants received feedback and periodic motivational calls over 12 weeks.                                                                           |     |    |          |                     |                                                     |               |                                        |
|                         |                                | Computer assisted self-management (CASM) with two calls from interventionist to support participants.                                                                                                                 |     |    |          | Computer, Telephone | Weekly feedback and 2 telephone follow up; 4 months | Social worker | Educational, Behavioural               |
| Huizinga, 2010 (USA)    | Usual care                     | Patient case management by nurse with referral to dietician if necessary. Interventionist helped participants titrate medication, identify and solve self-care behaviours such as diet, exercise and self-monitoring. | 164 | 55 | 92 (56)  | Telephone           | Monthly or quarterly ; 24 months                    | RN            | Educational, Behavioural               |
| Hussien, 2011 (Bahrain) | Usual care and physician visit | Interaction with patient via SMS on problem solving, skill building, advice and action plans in between clinic visits. Reminder SMS sent every 7 days to non-respondents                                              | 34  | 47 | NR       | SMS                 | Weekly; 3 months                                    | Physician     | Educational, Behavioural, Psychosocial |
| Piette, 2000 (USA)      | Usual care                     | Automated telephone disease management (ATDM) which consists of automated assessment and structured educational messages on self-care                                                                                 | 248 | 55 | 102 (41) | Telephone           | Weekly; 6 months                                    | RN            | Educational, Behavioural               |

|                                          |                                                                               |                                                                                                                                                                                     |      |    |          |                            |                           |              |                                        |
|------------------------------------------|-------------------------------------------------------------------------------|-------------------------------------------------------------------------------------------------------------------------------------------------------------------------------------|------|----|----------|----------------------------|---------------------------|--------------|----------------------------------------|
|                                          |                                                                               | delivered bi-weekly. Nurse educators called participants to address issues identified weekly.                                                                                       |      |    |          |                            |                           |              |                                        |
| Ralston, 2009 (USA)                      | Usual care                                                                    | Diabetes web-based care-management program by case manager which included patient electronic medical record access, feedback via emails, educational website and interactive diary. | 83   | 57 | 42 (51)  | Internet                   | Minimum weekly; 12 months | RN           | Educational, Behavioural               |
| Shea, 2009 (USA)                         | Usual care                                                                    | Web-based patient case management based upon clinical guidelines                                                                                                                    | 1665 | 71 | 619 (37) | Internet, VC               | NR; 12 months             | RN           | Educational, Behavioural               |
| Wayne, 2015 (Canada)                     | Health coaching to achieve health-behaviour changes                           | Health coaching with live-support by mobile phone                                                                                                                                   | 131  | 54 | 27 (28)  | Mobile phone               | Daily; 6 months           | Health coach | Educational, Behavioural               |
| Zhou, 2014 (China)                       | Usual care and educational session for diabetes self-management and nutrition | Patient educational message on self-management with monitoring                                                                                                                      | 108  | NR | NR       | Internet, Telephone or SMS | Every 2 weeks; 3 months   | NR           | Educational, Behavioural, Psychosocial |
| <b>Articles examining telemonitoring</b> |                                                                               |                                                                                                                                                                                     |      |    |          |                            |                           |              |                                        |
| Boaz, 2009 (Israel)                      | Usual care                                                                    | Remote patient monitoring with feedback and advice from nurse in the event blood values exceed range of 50-280mg/dL.                                                                | 35   | 63 | 13 (37)  | Internet                   | NR                        | DE           | Behavioural                            |

|                                |                                                                |                                                                                                               |     |    |         |              |                                |                                |                          |
|--------------------------------|----------------------------------------------------------------|---------------------------------------------------------------------------------------------------------------|-----|----|---------|--------------|--------------------------------|--------------------------------|--------------------------|
| Bujnowska-Fedak, 2011 (Poland) | Usual care                                                     | Remote patient monitoring at home with feedback in cases that require urgent medical attention (hypoglycemia) | 95  | 55 | 51 (53) | Internet     | NR; 6 months                   | RN                             | Behavioural              |
| Cho, 2006 (Korea)              | Usual care supplemented with diabetes education                | Remote patient monitoring with feedback by clinical instructors every 2 weeks                                 | 80  | 53 | 49 (61) | Internet     | Every fortnight; 30 months     | Endocrinologist, RN, Dietician | Educational, Behavioural |
| Cho, 2009 (Korea)              | Internet based remote patient monitoring                       | Remote patient monitoring via mobile phone                                                                    | 69  | 48 | 54 (78) | Mobile phone | Every fortnight; NR            | RN, Dietician                  | Educational, Behavioural |
| Earle, 2010 (UK)               | Usual care                                                     | Remote patient monitoring of blood glucose and blood pressure. Data recordings uploaded weekly.               | 137 | 58 | NR      | Mobile phone | Once a week; 6 months          | GP                             | Educational, Behavioural |
| Kim, 2016 (China)              | Usual care with baseline education                             | Remote patient monitoring with feedback weekly during 1 <sup>st</sup> 3 months then biweekly thereafter.      | 182 | 54 | 88 (48) | Internet     | At least once weekly; 6 months | RN                             | Behavioural              |
| Kwon, 2004 (Korea)             | Usual care with monthly clinic visit                           | Remote patient monitoring for 12 weeks                                                                        | 110 | 54 | 67 (61) | Internet     | At least once weekly; 3 months | RN, Dietician                  | Educational, Behavioural |
| Lee, 2015 (Malaysia)           | Usual care supplemented with Ramadan focused education session | Remote patient monitoring with feedback from interventionist                                                  | 37  | 51 | 16 (43) | Internet     | 5 times daily for 4 weeks      | Pharmacist                     | Behavioural              |

|                            |                                                  |                                                                                                                                                                           |     |    |             |                          |                          |               |                                        |
|----------------------------|--------------------------------------------------|---------------------------------------------------------------------------------------------------------------------------------------------------------------------------|-----|----|-------------|--------------------------|--------------------------|---------------|----------------------------------------|
| Lim, 2011<br>(Korea)       | Usual care with one diabetes education session   | Self-monitoring of blood glucose (SMBG) at least 8 times weekly                                                                                                           | 154 | 68 | 64<br>(42)  | Internet                 | NR                       | NR            | Behavioural                            |
|                            |                                                  | Remote patient monitoring as per SMBG group with feedback                                                                                                                 |     |    |             | Mobile phone             | Weekly; 6 months         | NR            | Educational, Behavioural               |
| Luley, 2011<br>(Germany)   | Usual care                                       | Integrated program comprising of remote patient monitoring with dietary changes                                                                                           | 70  | NR | NR          | Internet                 | Weekly; 6 months         | NR            | Educational, Behavioural, Psychosocial |
| Nicolucci, 2015<br>(Italy) | Usual care                                       | Home telehealth system which transmits data real-time to a central system. Nurses contact patient monthly by phone to discuss results and identify barriers to compliance | 302 | 58 | 186<br>(62) | Internet, SMS, telephone | Twice a month; 12 months | Physician, RN | Educational, Behavioural               |
| Or, 2016<br>(Hong Kong)    | Usual care with self-monitoring of blood glucose | Patient-centered, computer based remote patient monitoring with feedback                                                                                                  | 63  | 70 | 20<br>(32)  | Computer                 | NR                       | NR            | Behavioural                            |
| Pressman, 2014<br>(USA)    | Usual care                                       | Remote patient monitoring with online health diary. Measurements sent weekly with care managers responding based upon target goals.                                       | 225 | 56 | 139<br>(62) | Internet                 | Weekly; 6 months         | Physician, DE | Educational, Behavioural               |
| Quinn, 2011<br>(USA)       | Usual care with SMBG                             | Home telemonitoring with feedback                                                                                                                                         | 163 | 53 | 81<br>(50)  | Mobile phone             |                          | RN            | Behavioural                            |

|                                            |                                                                                |                                                                                                                |     |    |         |                     |                             |                          |                          |
|--------------------------------------------|--------------------------------------------------------------------------------|----------------------------------------------------------------------------------------------------------------|-----|----|---------|---------------------|-----------------------------|--------------------------|--------------------------|
|                                            |                                                                                | Home telemonitoring with feedback and access by physician to unanalyzed data                                   |     |    |         |                     | Every 2.5 months; 12 months | RN, Physician            | Educational, Behavioural |
|                                            |                                                                                | Home telemonitoring with feedback and access by physician to patient summary data and treatment recommendation |     |    |         |                     |                             | RN, Physician            | Educational, Behavioural |
| Tildesley, 2011 (Canada)                   | Usual care with option of calling endocrinologist for assistance when required | Remote patient monitoring on glucose every 2 weeks with feedback from endocrinologists                         | 47  | 59 | 29 (62) | Internet            | Data upload every 2 weeks   | Endocrinologist          | Educational, Behavioural |
| Yoo, 2009 (Korea)                          | Usual care                                                                     | Remote monitoring, online exercise diary and patient reminder                                                  | 111 | 58 | 65 (59) | Mobile phone        | 3 SMS per day; 3months      | RN                       | Educational, Behavioural |
| <b>Articles examining teleconsultation</b> |                                                                                |                                                                                                                |     |    |         |                     |                             |                          |                          |
| Ciemins, 2011 (USA)                        | Multidisciplinary team diabetes care management using face-to-face visit       | Multidisciplinary team diabetes care management in collaboration with local PCP via teleconferencing           | 206 | 62 | 80 (39) | VC                  | NR                          | DE, Dietician, Physician | Educational, Behavioural |
| Leichter, 2013 (USA)                       | Usual care with quarterly clinic visit                                         | Replacement of clinic visits at month 3 & 9 with remote consultation                                           | 98  | 48 | 55 (56) | Internet, Telephone | Every 3 months              | Endocrinologist          | Educational, Behavioural |
| Nagrebetsky, 2013 (UK)                     | Usual care with supportive lifestyle-focused education                         | Stepwise diabetes treatment program delivered remotely with supportive lifestyle-focused education             | 14  | 58 | 10 (71) | Telephone           | Twice weekly; 6 months      | RN                       | Educational, Behavioural |



|                                         |                                                                         |                                                                                                                              |     |    |          |                      |                                                                                  |                     |                                        |
|-----------------------------------------|-------------------------------------------------------------------------|------------------------------------------------------------------------------------------------------------------------------|-----|----|----------|----------------------|----------------------------------------------------------------------------------|---------------------|----------------------------------------|
| Rasmussen, 2015 (Denmark)               | Usual care                                                              | Home treatment by physicians via video consultation                                                                          | 40  | NR | 27 (67)  | Internet             | Every 3 weeks; 6 months                                                          | Physician           | Behavioural                            |
| Shahid, 2015 (Pakistan)                 | Usual care and physical examination after 4 months                      | Remote patient consultation and feedback on glucose monitoring, medications and lifestyle every 15 days for 4 months         | 440 | 49 | 270 (61) | Mobile phone         | Every 15 days; 4 months                                                          | RN                  | Educational, Behavioural               |
| Smith, 2008 (USA)                       | Usual care                                                              | Patient teleconsultation by endocrinologist                                                                                  | 635 | NR | 300 (47) | Internet             | Unclear                                                                          | Endocrinologist     | Educational                            |
| Whitlock, 2000 (USA)                    | Routine usual care                                                      | Weekly visits by case manager and monthly visit by physician using home telemedicine unit                                    | 28  | 63 | 11 (39)  | Internet             | Weekly and monthly; 3 months                                                     | RN, Physician       | Behavioural                            |
| Wong, 2005 (Hong Kong)                  | Routine hospital care                                                   | Remote patient management based upon patient health behaviour                                                                | 101 | 62 | 57 (56)  | Telephone            | Every 1-2 weeks; 6 months                                                        | RN                  | Educational, Behavioural               |
| <b>Articles examining telementoring</b> |                                                                         |                                                                                                                              |     |    |          |                      |                                                                                  |                     |                                        |
| Anderson-Loftin, 2005 (USA)             | Usual care with referral to diabetes class                              | Culturally appropriate educational classes on dietary strategies, peer-professional group discussion and telephone follow up | 97  | 57 | 21 (22)  | Telephone            | Weekly; 6 months                                                                 | Dietician, DE, Peer | Educational, Behavioural, Psychosocial |
| Chan, 2014 (Hong Kong)                  | Integrated care implemented through a web-based multi-component quality | Integrated care implemented through a web-based multi-component quality improvement program with telephone based support     | 628 | 55 | 355 (57) | Internet & Telephone | Biweekly for first 3 months, then once every other month for 6 months; 12 months | Physician, RN, Peer | Educational, Behavioural, Psychosocial |

|                        |                                                          |                                                                                                                                                                                              |     |    |           |           |                                                                                            |                     |                                                   |
|------------------------|----------------------------------------------------------|----------------------------------------------------------------------------------------------------------------------------------------------------------------------------------------------|-----|----|-----------|-----------|--------------------------------------------------------------------------------------------|---------------------|---------------------------------------------------|
|                        | improvement program                                      |                                                                                                                                                                                              |     |    |           |           |                                                                                            |                     |                                                   |
| Dale, 2009 (UK)        | Usual care                                               | Peer or nurse support delivered by telephone to motivate adherence and enhance self-efficacy among patients. Calls delivered 6 times at days 3-5, 7-10, 14-18, 28-35, 56-70 and 120-150.     | 231 | NR | 135 (58)  | Telephone | 6 sessions; 6 months                                                                       | RN, Peer            | Behavioural, Psychosocial                         |
| Dang, 2013 (Vietnam)   | Usual care supplemented with diabetes self-care booklets | Four classroom education by research team on diabetes self-education, monitoring, diet and stress management. Weekly call by peer leader for 1st 2 months and biweekly for the next 3 months | 102 | NR | NR        | Telephone | Weekly for first 2 months and biweekly every 3 months; 6 months                            | Peer                | Educational, Behavioural, Psychosocial            |
| Heisler, 2010 (USA)    | Enhanced usual care with nurse care management           | Paired peer with weekly telephone contact and optional group sharing                                                                                                                         | 244 | 62 | 244 (100) | Telephone | Minimum once weekly; 6 months                                                              | RN, Peer            | Educational, Behavioural, Psychosocial            |
| Keyserling, 2002 (USA) | Usual care                                               | Face to face clinic education with peer counsellor mentoring                                                                                                                                 | 200 | 59 | NR        | Telephone | Four clinic education session and monthly telephone calls with 3 group sessions; 12 months | Physician, DE, Peer | Educational, Behavioural, Cognitive, Psychosocial |
|                        |                                                          | Face to face clinic education peer                                                                                                                                                           |     |    |           |           |                                                                                            |                     |                                                   |

|                              |                                                                                                                                              |                                                                                                                                                                                                                                              |     |    |             |           |                                                                                                       |                                            |                                                   |
|------------------------------|----------------------------------------------------------------------------------------------------------------------------------------------|----------------------------------------------------------------------------------------------------------------------------------------------------------------------------------------------------------------------------------------------|-----|----|-------------|-----------|-------------------------------------------------------------------------------------------------------|--------------------------------------------|---------------------------------------------------|
| Long, 2012<br>(USA)          | Usual care                                                                                                                                   | Matched peer mentor to help identify the differences in behavior and goals and help identify realistic plans for goal achievement                                                                                                            | 117 | 60 | 110<br>(94) | Telephone | Minimum once weekly; 6 months                                                                         | Peer                                       | Educational, Behavioural, Psychosocial            |
|                              |                                                                                                                                              | Financial incentive based upon HbA1c goals achieved                                                                                                                                                                                          |     |    |             | N/A       | N/A                                                                                                   | N/A                                        | Financial                                         |
| Samuel-Hodges, 2009<br>(USA) | Usual care with pamphlets on diabetes self-care                                                                                              | Individual dietary assessment, goal setting, education and telephone contact by church diabetes advisors with 2 printed message from physician                                                                                               | 201 | 59 | 73<br>(33)  | Telephone | Twelve bi-weekly group session with monthly telephone follow up by church diabetes advisors; 6 months | Physician, Pharmacist, RN, Dietician, Peer | Educational, Behavioural, Cognitive, Psychosocial |
| Spenser, 2011<br>(USA)       | Usual care with access to community activities such as healthy eating demonstration, physical activity and weekly community farmers' produce | Usual care with access to family health advocates which promoted healthy lifestyle and diabetes self-management activities through education, two home visits, one clinic visit with doctor with advocate and telephone calls every 2 weeks. | 111 | 59 | 23<br>(21)  | Telephone | Telephone calls every 2 weeks; 6 months                                                               | Peer                                       | Educational, Behavioural, Psychosocial            |
| Thom, 2013<br>(USA)          | Usual care including access to nutritionist and diabetes educator through referral from primary care provider                                | Paired peer coach with telephone call at least twice monthly, minimum two face to face visits and one clinic visit if possible                                                                                                               | 299 | 55 | 143<br>(48) | Telephone | Telephone calls every 2 weeks; 6 months                                                               | Peer                                       | Educational, Behavioural, Psychosocial            |

|                                                                   |                                                       |                                                                                                                                                                                                                                                                           |     |    |          |           |                                                                                                             |                 |                                     |
|-------------------------------------------------------------------|-------------------------------------------------------|---------------------------------------------------------------------------------------------------------------------------------------------------------------------------------------------------------------------------------------------------------------------------|-----|----|----------|-----------|-------------------------------------------------------------------------------------------------------------|-----------------|-------------------------------------|
| Walker, 2011 (USA)                                                | Usual care and provision of self-management materials | Up to 10 calls at 4 to 6 weeks intervals by health educator over 1 year. Calls focused primary on patient empowerment to improve self-efficacy, medication adherence and lifestyle changes                                                                                | 526 | 56 | 173 (33) | Telephone | Up to 10 calls; 12 months                                                                                   | Health educator | Educational, Behavioural            |
| <b>Articles examining teleeducation &amp; telecase-management</b> |                                                       |                                                                                                                                                                                                                                                                           |     |    |          |           |                                                                                                             |                 |                                     |
| Carter, 2011 (USA)                                                | Usual care                                            | Integrated care with self-management, education and nurse support delivered by VC. Action plans developed bi-weekly during the 30 min conferences with patients.                                                                                                          | 47  | 49 | 17 (36)  | VC        | Biweekly ; 9 months                                                                                         | RN              | Educational, Behavioural, Cognitive |
| Cho, 2011 (Korea)                                                 | Usual care with SMBG and diabetes education           | Remote patient coaching and management by physician. Face-to-face education by nurses.                                                                                                                                                                                    | 71  | 64 | 28 (39)  | Internet  | Weekly; 3 months                                                                                            | RN, Physician   | Educational, Behavioural            |
| Crowley, 2013 (USA)                                               | Usual care                                            | Standardised educational modules delivered by nurse to enable patient self-management and behavioural modification. Interventionist also facilitate medication management by providing summaries to attending physicians who will make the decision on medication changes | 359 | 57 | 101 (28) | Telephone | Monthly telephone call over 12 months. Additional contact to doctor every 3 months on medication management | NR              | Educational, Behavioural, Cognitive |

|                          |                                                                                   |                                                                                                                                                                                                                             |     |    |             |              |                                                                                                    |                  |                                     |
|--------------------------|-----------------------------------------------------------------------------------|-----------------------------------------------------------------------------------------------------------------------------------------------------------------------------------------------------------------------------|-----|----|-------------|--------------|----------------------------------------------------------------------------------------------------|------------------|-------------------------------------|
| Holmen, 2014<br>(Norway) | Usual care                                                                        | Mobile based application to increase self-management through education                                                                                                                                                      | 151 | 57 | 89<br>(59)  | Mobile phone | Daily; 1 year                                                                                      | NR               | Educational, Behavioural            |
|                          |                                                                                   | Mobile based application to increase self-management through education with motivational and health counseling. Structured counseling over 4 months (5 sessions) by nurse.                                                  |     |    |             | Mobile phone | Daily; 1 year, 5 education sessions; 4 months                                                      | RN, dietician    | Educational, Behavioural, Cognitive |
| Maljanian, 2005 (USA)    | Usual care supplemented with diabetes education and collaborative care management | As per control group with additional weekly calls to reinforce patient education and self-management skills over 12 weeks. Calls were focused to reinforce importance of glycemic control, complications and comorbidities. | 336 | 58 | 157<br>(47) | Telephone    | 12 sessions; 12 months                                                                             | RN, Nutritionist | Educational                         |
| Nesari, 2010<br>(Iran)   | Usual care supplemented with diabetes education                                   | Reinforcement of diabetes self- management, education and drug adjustment. Telephone calls were at least twice weekly for 1 month and weekly for next 2 months                                                              | 60  | 51 | 17<br>(28)  | Telephone    | 16 calls; 3 months                                                                                 | NR               | Educational, Behavioural            |
| Oh , 2003<br>(Korea)     | Usual care                                                                        | Continuous patient education, lifestyle adjustment advice with drug adjustment. Telephone calls were at least twice weekly for 1                                                                                            | 50  | 61 | 18<br>(36)  | Telephone    | Twice a week for 1 <sup>st</sup> month, once a week for 2 <sup>nd</sup> and 3 <sup>rd</sup> months | NR               | Educational, Behavioural            |

|                     |            |                                                                                                                                                                                                                                                              |     |    |          |                                               |                                               |                                     |                                                   |
|---------------------|------------|--------------------------------------------------------------------------------------------------------------------------------------------------------------------------------------------------------------------------------------------------------------|-----|----|----------|-----------------------------------------------|-----------------------------------------------|-------------------------------------|---------------------------------------------------|
|                     |            | month and weekly for next 2 months.                                                                                                                                                                                                                          |     |    |          |                                               |                                               |                                     |                                                   |
| Piette, 2001 (USA)  | Usual care | Automated structured educational messages. Weekly nurse follow-up based upon participants response to educational messages and discussed appropriate self-care issues.                                                                                       | 272 | 61 | 264 (97) | Telephone                                     | Weekly; 12 months                             | RN                                  | Educational, Behavioural                          |
| Schillinger, 2009   | Usual care | Automated calls to support patient in diabetes self-care management and psychological issues in patients' native language as well as monitoring and health educational messages. Case-manager assist patient to problem solve and individualise action plans | 339 | 55 | 139 (41) | SMS                                           | Weekly over 39 weeks                          | Nurse                               | Educational, Behavioural, Cognitive               |
|                     |            | Face-to-face                                                                                                                                                                                                                                                 |     |    |          | Monthly for 9 months; 90 minutes each session | Physician, Pharmacist                         | Educational, Behavioural, Financial |                                                   |
| Tjam, 2006 (Canada) | Usual care | Interactive online disease management program and patient education                                                                                                                                                                                          | 57  | NR | NR       | Internet                                      | NR                                            | RN                                  | Educational, Behavioural                          |
| Young, 2005 (UK)    | Usual care | Structured telephone calls to support and guide patients on self-efficacy. Frequency of calls varied,                                                                                                                                                        | 591 | NR | 343 (58) | Telephone                                     | Variable depending on HbA1c levels; 12 months | RN, Peer                            | Educational, Behavioural, Cognitive, Psychosocial |

|                                                              |                                                                         |                                                                                                |     |            |          |                         |                     |               |                                        |
|--------------------------------------------------------------|-------------------------------------------------------------------------|------------------------------------------------------------------------------------------------|-----|------------|----------|-------------------------|---------------------|---------------|----------------------------------------|
|                                                              |                                                                         | depending on last HbA1c level.                                                                 |     |            |          |                         |                     |               |                                        |
| <b>Articles examining teleeducation &amp; telemonitoring</b> |                                                                         |                                                                                                |     |            |          |                         |                     |               |                                        |
| Chen, 2011 (Taiwan)                                          | Usual care                                                              | Intensive diabetes educational program with remote patient monitoring                          | 64  | 54         | 29 (46)  | Internet                | 6 sessions; NR      | DE            | Educational, Behavioural               |
| Faridi, 2008 (USA)                                           | Usual care and use of pedometer                                         | Tailored patient educational messages with remote monitoring and use of pedometer              | 30  | 56         | 11 (37)  | Mobile phone            | Daily; 3 months     | NR            | Educational, Behavioural               |
| Greenwood, 2015 (USA)                                        | Usual care with diabetes education as needed                            | Sequential daily health sessions and structured remote monitoring                              | 90  | 56         | 69 (77)  | Internet                | Daily; 6 months     | DE, Physician | Educational, Behavioural               |
| Karhula, 2015                                                | Usual care and disease management educational booklet                   | Health coaching every 4-6 weeks (30 mins each) and remote patient monitoring (weekly)          | 250 | 66.2 (8.6) | 139 (56) | Internet & mobile phone |                     | Health coach  | Educational, Behavioural               |
| Lim, 2016 (Korea)                                            | Usual care with baseline education and self-monitoring of blood glucose | Individualized multidisciplinary U-healthcare system with feedback                             | 100 | 65         | 75 (75)  | Mobile phone            | Daily; 6 months     | NR            | Behavioural,                           |
| Steventon, 2015 (UK)                                         | Usual care                                                              | Remote telemonitoring with feedback via video, message to educate patients on their conditions | 513 | 65         | NR       | Internet                | Variable; 12 months | RN            | Educational, Behavioural, Psychosocial |

|                                                                    |                                                             |                                                                                              |     |    |             |                 |                                                              |                               |                                        |
|--------------------------------------------------------------------|-------------------------------------------------------------|----------------------------------------------------------------------------------------------|-----|----|-------------|-----------------|--------------------------------------------------------------|-------------------------------|----------------------------------------|
| Tang, 2013<br>(USA)                                                | Usual care                                                  | Personalized video educational message and remote monitoring                                 | 415 | 54 | 249<br>(60) | Internet        | 3 in person visit and tailored online monitoring; 6 months   | RN, DE, Pharmacist, Dietician | Educational, Behavioural               |
| Wakefield, 2011 (USA)                                              | Usual care                                                  | Remote patient monitoring                                                                    | 302 | 68 | 296<br>(98) | Telephone       | Weekly; 12 months                                            | RN, DE, Physician             | Behavioural, Psychosocial              |
|                                                                    |                                                             | Remote patient monitoring with prompts and educational messages on disease management        |     |    |             |                 |                                                              |                               | Educational, Behavioural, Psychosocial |
| <b>Articles examining telecase-management &amp; telemonitoring</b> |                                                             |                                                                                              |     |    |             |                 |                                                              |                               |                                        |
| Anzaldo-Campos, 2016<br>(Brazil)                                   | Usual care                                                  | Combined care management and peer support                                                    | 301 | 52 | 100<br>(33) | Face-to-face    | 8 session with additional non-compulsory sessions; 10 months | RN, Peer                      | Behavioural, Psychosocial              |
|                                                                    |                                                             | Combined care management, peer support with remote patient monitoring                        |     |    |             | Internet        | Variable but intensity decreases over time;                  | RN, Peer                      | Behavioural, Psychosocial              |
| Castelnuovo 2011, (Italy)                                          | Hospital-based treatment and usual follow-up when necessary | In-patient nutritional & psychological counselling with web-based monitoring and counselling | 34  | -  | 18<br>(53)  | Internet        | NR                                                           | DE                            | Educational, Behavioural               |
| Del Prato, 2012 (Italy)                                            | Usual SMBG                                                  | Remote patient monitoring of blood glucose and self-management                               | 241 | 58 | 125<br>(52) | Handheld device | Daily; 6 months                                              | Endocrinologist               | Behavioural, Psychosocial              |



|                                     |                                                 |                                                                                                                                             |     |    |             |                     |                                                  |                |                          |
|-------------------------------------|-------------------------------------------------|---------------------------------------------------------------------------------------------------------------------------------------------|-----|----|-------------|---------------------|--------------------------------------------------|----------------|--------------------------|
| Kim, 2008<br>(Korea)                | Usual care                                      | Daily patient monitoring of glucose and disease management sent by SMS or internet weekly                                                   | 34  | 47 | 16<br>(47)  | SMS                 | Weekly; 12 months                                | DE, RN         | Educational, Behavioural |
| Kim, 2009<br>(Korea)                | Delayed intervention                            | Integrated diabetic self-help, management and remote glucose monitoring. Structured counseling based upon average monthly results.          | 79  | 56 | 44<br>(56)  | Internet, Telephone | 6 education session & 6 telephone call; 6 months | RN             | Educational, Behavioural |
| McMahon, 2005 (USA)                 | Usual care supplemented with diabetes education | Web-based care management & monitoring                                                                                                      | 104 | 64 | 103<br>(99) | Internet            | NR; 12 months                                    | DE, Physician  | Educational, Behavioural |
| McMahon, 2012 (USA)                 | Usual care with Internet training               | Online diabetes care management with monitoring                                                                                             | 151 | 60 | 143<br>(95) | Internet            | NR                                               | RN, Pharmacist | Educational, Behavioural |
|                                     |                                                 | Diabetes self-management with monitoring                                                                                                    |     |    |             | Telephone           |                                                  |                |                          |
| Orsama, 2013<br>(Finland)           | Usual care                                      | Remote patient monitoring and reporting of health related parameters. Automated personalized feedback sent based upon reported measurements | 48  | 62 | 26<br>(54)  | Mobile phone        | Weekly; 10 months                                | Physician, RN  | Educational, Behavioural |
| Rodriguez-Idigoras, 2009<br>(Spain) | Usual care                                      | Remote patient monitoring with telephone based-care and consultation                                                                        | 328 | NR | 169<br>(52) | Mobile phone        | NR; 12 months                                    | Physician, RN  | Behavioural              |

|                                                                      |                                                                 |                                                   |     |    |         |                     |                              |               |                          |
|----------------------------------------------------------------------|-----------------------------------------------------------------|---------------------------------------------------|-----|----|---------|---------------------|------------------------------|---------------|--------------------------|
| Stone, 2010<br>(USA)                                                 | Monthly care coordination                                       | Active care management and remote home monitoring | 137 | NR | NR      | Internet            | Daily transmission; 6 months | RN            | Educational, Behavioural |
| Stone, 2012<br>(USA)                                                 | Usual care                                                      | Active patient care only                          | 101 | NR | 99 (98) | Telephone           | Monthly; 6 months            | RN            | Educational              |
|                                                                      | Care coordination                                               | Active care management and remote home monitoring |     |    |         | Telephone, Internet | Daily; 6 months              | RN            | Educational, Behavioural |
| Waki, 2014<br>(Japan)                                                | Usual care                                                      | Remote patient monitoring and self-management     | 54  | 55 | 41 (76) | Internet            | Variable; 3 months           | Physician, RN | Behavioural              |
| <b>Articles examining telecase-management &amp; teleconsultation</b> |                                                                 |                                                   |     |    |         |                     |                              |               |                          |
| Hsu 2016,<br>(USA)                                                   | Education on insulin injection based upon standardised protocol | Remote patient monitoring with feedback           | 40  | 54 | -       | Internet            | NR                           | DE            | Educational, Behavioural |

NR- Not reported, SMS – Short messaging system, RN – Registered nurse, DE- Diabetes educator



|                                               |                                          |   |   |   |   |  |   |   |   |   |   |   |   |   |   |  |  |   |
|-----------------------------------------------|------------------------------------------|---|---|---|---|--|---|---|---|---|---|---|---|---|---|--|--|---|
| Piette, 2011                                  |                                          | Y | Y | Y | Y |  |   |   | Y | Y |   |   |   |   |   |  |  |   |
| Plotnikoff, 2013                              | Print materials with pedometer           |   |   |   | Y |  |   |   |   |   |   |   |   |   |   |  |  |   |
|                                               | Print materials, pedometer & counselling |   |   | Y | Y |  |   |   | Y | Y |   |   |   |   |   |  |  |   |
| Sacco, 2009                                   |                                          | Y |   | Y | Y |  | Y |   | Y | Y | Y |   |   |   |   |  |  |   |
| Shetty, 2011                                  |                                          |   | Y |   | Y |  |   |   | Y |   | Y |   |   |   |   |  |  |   |
| Whittemore, 2004                              |                                          | Y |   | Y | Y |  | Y |   | Y |   | Y | Y |   |   |   |  |  |   |
| Williams, 2012                                |                                          | Y | Y |   | Y |  | Y |   | Y |   | Y | Y |   |   |   |  |  |   |
| Wolever, 2010                                 |                                          | Y | Y | Y | Y |  | Y |   | Y | Y | Y | Y |   |   |   |  |  |   |
| Yoon, 2008                                    |                                          | Y | Y |   | Y |  |   |   |   | Y | Y | Y |   |   |   |  |  | Y |
| Zolfaghari, 2011                              |                                          | Y | Y |   | Y |  |   |   | Y | Y | Y | Y |   | Y |   |  |  | Y |
| <b>Articles examining telecase-management</b> |                                          |   |   |   |   |  |   |   |   |   |   |   |   |   |   |  |  |   |
| Anderson, 2011                                |                                          | Y | Y |   |   |  | Y |   | Y |   | Y | Y |   |   |   |  |  |   |
| Aubert, 1998                                  |                                          | Y | Y | Y | Y |  | Y |   | Y |   | Y | Y |   |   |   |  |  |   |
| Glasgow, 2010                                 | Computer assisted self-management (CASM) | Y |   |   | Y |  | Y |   |   |   | Y | Y |   |   |   |  |  |   |
|                                               | Enhanced CASM                            | Y | Y |   | Y |  | Y |   | Y |   |   |   |   |   |   |  |  |   |
| Huizinga, 2010                                |                                          | Y | Y |   | Y |  | Y |   | Y |   | Y | Y |   |   |   |  |  |   |
| Hussien, 2011                                 |                                          | Y | Y |   | Y |  | Y | Y |   |   | Y | Y |   |   |   |  |  |   |
| Piette, 2000                                  |                                          | Y | Y |   | Y |  | Y |   | Y |   | Y | Y |   |   |   |  |  |   |
| Ralston, 2009                                 |                                          | Y | Y |   | Y |  | Y |   | Y |   | Y | Y |   |   |   |  |  |   |
| Shea, 2009                                    |                                          | Y | Y |   | Y |  | Y |   |   |   | Y | Y |   |   |   |  |  |   |
| Wayne, 2015                                   |                                          | Y | Y |   | Y |  | Y |   |   |   | Y | Y |   |   |   |  |  |   |
| Zhou, 2014                                    |                                          | Y | Y |   | Y |  | Y |   |   | Y | Y | Y |   |   |   |  |  | Y |
| <b>Articles examining telemonitoring</b>      |                                          |   |   |   |   |  |   |   |   |   |   |   |   |   |   |  |  |   |
| Boaz, 2009                                    |                                          | Y | Y |   |   |  | Y |   |   |   |   |   |   |   |   |  |  |   |
| Bujnowska-Fedak, 2011                         |                                          | Y | Y |   |   |  |   |   |   |   |   | Y |   |   |   |  |  |   |
| Cho, 2006                                     |                                          | Y | Y |   |   |  |   |   | Y |   |   | Y |   |   |   |  |  |   |
| Cho, 2009                                     |                                          | Y | Y |   | Y |  |   |   |   |   | Y | Y |   |   |   |  |  |   |
| Earle, 2010                                   |                                          | Y | Y |   | Y |  |   |   |   |   |   |   | Y |   | Y |  |  |   |
| Kim, 2016                                     |                                          |   | Y |   |   |  |   |   |   |   |   |   |   |   |   |  |  |   |
| Kwon, 2004                                    |                                          | Y | Y |   | Y |  | Y |   |   |   | Y | Y |   |   |   |  |  |   |
| Lee, 2015                                     |                                          |   | Y |   | Y |  |   |   |   | Y |   | Y |   |   |   |  |  |   |
| Lim, 2011                                     | Self-monitoring only                     |   | Y |   |   |  |   |   |   |   | Y |   |   |   |   |  |  |   |
|                                               | U-healthcare group                       |   | Y |   | Y |  |   |   | Y |   |   |   |   |   |   |  |  |   |
| Luley, 2011                                   |                                          | Y | Y |   | Y |  |   |   | Y |   | Y | Y |   |   |   |  |  |   |
| Nicolucci, 2015                               |                                          | Y | Y |   | Y |  |   |   |   |   | Y | Y |   |   |   |  |  |   |
| Or, 2016                                      |                                          | Y | Y |   |   |  |   |   |   |   |   |   |   |   |   |  |  |   |
| Pressman, 2014                                |                                          | Y | Y |   | Y |  | Y |   |   |   | Y | Y |   |   |   |  |  |   |

|                                                                   |                                               |   |   |   |   |   |   |   |   |  |   |   |  |   |  |   |  |  |  |
|-------------------------------------------------------------------|-----------------------------------------------|---|---|---|---|---|---|---|---|--|---|---|--|---|--|---|--|--|--|
| Quinn, 2011                                                       | Monitoring with feedback                      |   | Y |   | Y |   |   |   |   |  |   |   |  |   |  |   |  |  |  |
|                                                                   | As above with unanalysed feedback from doctor | Y | Y |   | Y |   | Y |   |   |  | Y |   |  |   |  |   |  |  |  |
|                                                                   | As above with feedback on treatment           | Y | Y |   | Y |   | Y |   |   |  |   |   |  |   |  |   |  |  |  |
| Tildesley, 2011                                                   |                                               | Y | Y |   | Y |   | Y |   |   |  | Y |   |  |   |  |   |  |  |  |
| Yoo, 2009                                                         |                                               | Y | Y |   | Y |   | Y |   |   |  | Y |   |  |   |  |   |  |  |  |
| <b>Articles examining teleconsultation</b>                        |                                               |   |   |   |   |   |   |   |   |  |   |   |  |   |  |   |  |  |  |
| Ciemens, 2011                                                     |                                               | Y | Y |   | Y |   | Y |   |   |  | Y | Y |  |   |  |   |  |  |  |
| Leichter, 2013                                                    |                                               | Y | Y |   | Y |   | Y |   |   |  | Y | Y |  |   |  |   |  |  |  |
| Nagrebetsky, 2013                                                 |                                               | Y | Y |   | Y |   |   |   |   |  | Y | Y |  |   |  |   |  |  |  |
| Rasmussen, 2015                                                   |                                               | Y | Y |   |   |   |   |   |   |  | Y | Y |  |   |  |   |  |  |  |
| Smith, 2008                                                       |                                               | Y |   |   |   |   |   |   | Y |  |   |   |  | Y |  |   |  |  |  |
| Shahid, 2015                                                      |                                               | Y | Y |   | Y |   |   |   |   |  | Y | Y |  |   |  |   |  |  |  |
| Whitlock, 2000                                                    |                                               | Y |   |   |   |   | Y |   |   |  | Y |   |  |   |  |   |  |  |  |
| Wong, 2005                                                        |                                               | Y | Y |   | Y |   | Y |   | Y |  | Y | Y |  |   |  |   |  |  |  |
| <b>Articles examining telementoring</b>                           |                                               |   |   |   |   |   |   |   |   |  |   |   |  |   |  |   |  |  |  |
| Anderson-Loftin, 2005                                             |                                               | Y |   |   | Y |   | Y | Y | Y |  | Y |   |  | Y |  |   |  |  |  |
| Chan, 2014                                                        |                                               | Y | Y |   | Y |   | Y | Y |   |  | Y | Y |  | Y |  | Y |  |  |  |
| Dale, 2009                                                        |                                               | Y | Y |   |   |   | Y |   |   |  | Y | Y |  |   |  |   |  |  |  |
| Dang, 2013                                                        |                                               |   | Y |   | Y |   | Y | Y |   |  |   |   |  | Y |  |   |  |  |  |
| Heisler, 2010                                                     |                                               |   | Y |   |   |   | Y | Y |   |  | Y | Y |  |   |  |   |  |  |  |
| Keyserling, 2002                                                  | Clinic education with peer support            | Y | Y | Y | Y |   | Y | Y |   |  | Y | Y |  |   |  |   |  |  |  |
|                                                                   | Clinic education                              | Y | Y | Y | Y |   | Y |   |   |  |   |   |  |   |  |   |  |  |  |
| Long, 2012                                                        | Matched peer mentor support                   | Y | Y | Y |   |   |   | Y |   |  |   |   |  |   |  |   |  |  |  |
|                                                                   | Financial incentive                           |   |   |   |   | Y |   |   |   |  |   |   |  |   |  |   |  |  |  |
| Samuel-Hodges, 2009                                               |                                               | Y | Y | Y | Y |   | Y | Y | Y |  | Y |   |  |   |  |   |  |  |  |
| Spenser, 2011                                                     |                                               | Y | Y |   | Y |   | Y | Y |   |  | Y |   |  |   |  |   |  |  |  |
| Thom, 2013                                                        |                                               | Y | Y |   | Y |   | Y | Y |   |  | Y |   |  |   |  |   |  |  |  |
| Walker, 2011                                                      |                                               | Y |   |   | Y |   | Y |   | Y |  |   |   |  | Y |  |   |  |  |  |
| <b>Articles examining teleeducation &amp; telecase-management</b> |                                               |   |   |   |   |   |   |   |   |  |   |   |  |   |  |   |  |  |  |
| Carter, 2011                                                      |                                               | Y | Y | Y | Y |   | Y |   |   |  | Y | Y |  |   |  |   |  |  |  |
| Cho, 2011                                                         |                                               | Y | Y |   |   |   | Y |   |   |  | Y | Y |  |   |  |   |  |  |  |
| Crowley, 2013                                                     |                                               | Y | Y | Y | Y |   | Y |   | Y |  | Y |   |  |   |  |   |  |  |  |
| Holmen, 2014                                                      | Education only                                |   | Y |   |   |   |   |   |   |  | Y | Y |  |   |  |   |  |  |  |

|                                                                    |                                                                     |   |   |   |   |   |   |  |   |   |   |   |  |   |  |   |  |   |  |
|--------------------------------------------------------------------|---------------------------------------------------------------------|---|---|---|---|---|---|--|---|---|---|---|--|---|--|---|--|---|--|
|                                                                    | Education with case-management                                      | Y | Y | Y |   |   | Y |  |   |   |   |   |  |   |  |   |  |   |  |
| Maljanian, 2005                                                    |                                                                     | Y |   |   | Y |   |   |  | Y |   | Y | Y |  |   |  |   |  |   |  |
| Nesari, 2010                                                       |                                                                     | Y | Y |   | Y |   | Y |  | Y |   | Y | Y |  |   |  |   |  |   |  |
| Oh , 2003                                                          |                                                                     | Y | Y |   | Y |   | Y |  |   |   | Y | Y |  |   |  |   |  |   |  |
| Piette, 2001                                                       |                                                                     | Y | Y |   | Y |   | Y |  |   |   | Y | Y |  |   |  |   |  |   |  |
| Schillinger, 2009                                                  | Automated telephone self-management support                         | Y | Y | Y | Y |   |   |  | Y |   | Y |   |  |   |  |   |  |   |  |
|                                                                    | Group medical visits to physician and health educators facilitation | Y |   | Y | Y | Y |   |  | Y |   |   |   |  |   |  |   |  |   |  |
| Tjam, 2006                                                         |                                                                     | Y | Y |   | Y |   | Y |  | Y |   | Y | Y |  |   |  |   |  |   |  |
| Young, 2005                                                        |                                                                     | Y | Y | Y | Y |   | Y |  | Y | Y | Y | Y |  |   |  |   |  |   |  |
| <b>Articles examining teleeducation &amp; telemonitoring</b>       |                                                                     |   |   |   |   |   |   |  |   |   |   |   |  |   |  |   |  |   |  |
| Chen, 2011                                                         |                                                                     | Y | Y |   | Y |   | Y |  | Y |   |   |   |  | Y |  | Y |  | Y |  |
| Faridi, 2008                                                       |                                                                     | Y | Y |   | Y |   |   |  |   |   | Y |   |  |   |  |   |  |   |  |
| Greenwood, 2015                                                    |                                                                     | Y | Y |   | Y |   | Y |  | Y |   | Y | Y |  | Y |  |   |  |   |  |
| Karhula, 2015                                                      |                                                                     | Y | Y |   | Y |   | Y |  |   |   | Y | Y |  |   |  |   |  |   |  |
| Lim, 2016                                                          |                                                                     |   | Y |   |   |   |   |  |   |   |   |   |  |   |  |   |  |   |  |
| Steventon, 2015                                                    |                                                                     | Y | Y |   | Y |   |   |  | Y |   | Y |   |  |   |  |   |  |   |  |
| Tang, 2013                                                         |                                                                     | Y | Y |   | Y |   | Y |  | Y |   | Y | Y |  |   |  |   |  |   |  |
| Wakefield, 2011                                                    | High intensity                                                      | Y | Y |   | Y |   | Y |  | Y | Y | Y |   |  |   |  |   |  |   |  |
|                                                                    | Low intensity                                                       | Y | Y |   | Y |   | Y |  | Y | Y |   |   |  |   |  |   |  |   |  |
| <b>Articles examining telecase-management &amp; telemonitoring</b> |                                                                     |   |   |   |   |   |   |  |   |   |   |   |  |   |  |   |  |   |  |
| Anzaldo-Campos, 2016                                               | Peer support and care management                                    | Y |   |   |   |   | Y |  | Y |   |   |   |  |   |  |   |  |   |  |
|                                                                    | Peer support, care management & monitoring                          | Y | Y |   |   |   | Y |  | Y |   |   |   |  |   |  |   |  |   |  |
| Castelnuovo, 2011                                                  |                                                                     | Y | Y | Y | Y |   | Y |  | Y |   | Y |   |  |   |  |   |  |   |  |
| Del Prato, 2012                                                    |                                                                     | y | Y |   |   |   | Y |  | Y |   | Y | Y |  |   |  |   |  |   |  |
| Kim, 2008                                                          |                                                                     | Y | Y |   | Y |   |   |  |   |   | Y | Y |  |   |  |   |  |   |  |
| Kim, 2009                                                          |                                                                     | Y | Y |   | Y |   | Y |  |   |   | Y | Y |  |   |  |   |  |   |  |
| McMahon, 2005                                                      |                                                                     | y | Y |   | Y |   |   |  |   |   | Y | Y |  |   |  |   |  |   |  |
| McMahon, 2012                                                      | Online care group                                                   | Y | Y |   | Y |   | Y |  |   |   | Y | Y |  | Y |  |   |  | Y |  |
|                                                                    | Telephone care group                                                | Y | Y |   | Y |   | Y |  |   |   | Y | Y |  | Y |  |   |  | Y |  |
| Orsama, 2013                                                       |                                                                     | y | Y |   | Y |   | Y |  | Y |   | Y | Y |  |   |  |   |  |   |  |
| Rodriguez-Idigoras, 2009                                           |                                                                     | y | Y |   |   |   | Y |  |   |   | Y | Y |  |   |  |   |  |   |  |
| Stone, 2010                                                        |                                                                     | y | Y |   | Y |   |   |  |   |   | Y | Y |  |   |  |   |  |   |  |

|                                                                    |                                  |   |   |  |   |  |   |  |  |  |   |   |  |  |  |  |  |  |  |
|--------------------------------------------------------------------|----------------------------------|---|---|--|---|--|---|--|--|--|---|---|--|--|--|--|--|--|--|
| Stone, 2012                                                        | Care coordination calls          | Y | Y |  | Y |  |   |  |  |  | Y | Y |  |  |  |  |  |  |  |
|                                                                    | Active care with home monitoring | Y | Y |  | Y |  |   |  |  |  |   |   |  |  |  |  |  |  |  |
| Waki, 2014                                                         |                                  | Y | Y |  |   |  |   |  |  |  | Y | Y |  |  |  |  |  |  |  |
| <b>Articles examining telecase-management &amp; telemonitoring</b> |                                  |   |   |  |   |  |   |  |  |  |   |   |  |  |  |  |  |  |  |
| Hsu, 2016                                                          |                                  | Y | Y |  | Y |  | Y |  |  |  | Y |   |  |  |  |  |  |  |  |





|                                                                   |                                                                     |   |   |   |   |   |  |   |   |   |   |   |  |
|-------------------------------------------------------------------|---------------------------------------------------------------------|---|---|---|---|---|--|---|---|---|---|---|--|
|                                                                   | Print materials, pedometer & counselling                            | Y | Y | Y | Y | Y |  |   |   |   |   |   |  |
| Sacco, 2009                                                       |                                                                     | Y | Y | Y |   | Y |  |   |   |   |   |   |  |
| Shetty, 2011                                                      |                                                                     | Y | Y |   |   | Y |  | Y | Y |   |   | Y |  |
| Whittemore, 2004                                                  |                                                                     | Y |   |   |   |   |  |   |   |   |   |   |  |
| Williams, 2012                                                    |                                                                     | Y | Y |   |   | Y |  |   |   |   |   |   |  |
| Wolever, 2010                                                     |                                                                     | Y | Y |   |   | Y |  |   |   |   |   |   |  |
| Yoon, 2008                                                        |                                                                     | Y |   |   |   |   |  |   |   |   |   |   |  |
| Zolfaghari, 2011                                                  |                                                                     | Y | Y | Y | Y | Y |  | Y | Y |   |   | Y |  |
| <b>Articles examining teleeducation &amp; telemonitoring</b>      |                                                                     |   |   |   |   |   |  |   |   |   |   |   |  |
| Chen, 2011                                                        |                                                                     | Y |   |   | Y |   |  | Y |   |   |   | Y |  |
| Faridi, 2008                                                      |                                                                     | Y |   |   |   |   |  | Y |   |   |   |   |  |
| Greenwood, 2015                                                   |                                                                     | Y | Y |   |   | Y |  |   |   |   |   |   |  |
| Karhula, 2015                                                     |                                                                     | Y |   |   |   |   |  |   |   |   |   |   |  |
| Lim, 2016                                                         |                                                                     | Y | Y |   |   |   |  | Y | Y |   |   |   |  |
| Steventon, 2015                                                   |                                                                     | Y |   |   |   |   |  |   |   |   |   |   |  |
| Tang, 2013                                                        |                                                                     | Y | Y |   |   | Y |  |   |   |   |   |   |  |
| Wakefield, 2011                                                   | High intensity                                                      | Y | Y | Y |   | Y |  |   |   |   |   |   |  |
|                                                                   | Low intensity                                                       | Y | Y | Y |   | Y |  |   |   |   |   |   |  |
| <b>Articles examining teleeducation &amp; telecase-management</b> |                                                                     |   |   |   |   |   |  |   |   |   |   |   |  |
| Carter, 2011                                                      |                                                                     | Y | Y |   |   |   |  |   |   |   |   |   |  |
| Cho, 2011                                                         |                                                                     | Y | Y |   |   |   |  |   |   |   |   |   |  |
| Crowley, 2013                                                     |                                                                     | Y | Y |   | Y |   |  |   |   |   |   |   |  |
| Holmen, 2014                                                      | Education only                                                      | Y |   |   |   |   |  |   |   |   |   |   |  |
|                                                                   | Education with case-management                                      | Y | Y |   |   |   |  |   |   |   |   |   |  |
| Maljanian, 2005                                                   |                                                                     | Y | Y | Y | Y |   |  | Y | Y |   |   |   |  |
| Nesari, 2010                                                      |                                                                     | Y | Y | Y | Y | Y |  | Y | Y | Y | Y |   |  |
| Oh , 2003                                                         |                                                                     | Y | Y |   |   |   |  |   |   |   |   |   |  |
| Piette, 2001                                                      |                                                                     | Y |   |   |   | Y |  | Y |   |   |   |   |  |
| Schillinger, 2009                                                 | Automated telephone self-management support                         | Y | Y |   | Y |   |  |   |   |   |   |   |  |
|                                                                   | Group medical visits to physician and health educators facilitation |   |   |   |   |   |  |   |   |   |   |   |  |
| Tjam, 2006                                                        |                                                                     |   |   | Y | Y | Y |  | Y | Y |   |   | Y |  |
| Young, 2005                                                       |                                                                     | Y | Y |   |   | Y |  |   |   |   |   |   |  |

**Table S6: Details of self-monitoring frequency and recommended schedule**

| Author                                   | Intervention                                                                   |                                                                                      |                                            |                                  | Control                                                       |               |                                            |                                  |
|------------------------------------------|--------------------------------------------------------------------------------|--------------------------------------------------------------------------------------|--------------------------------------------|----------------------------------|---------------------------------------------------------------|---------------|--------------------------------------------|----------------------------------|
|                                          | Monitoring frequency (Target readings per week)                                | SMBG Schedule                                                                        | No of days over which monitoring is spread | Person delivering meter training | Monitoring frequency (Target readings per week)               | SMBG Schedule | No of days over which monitoring is spread | Person delivering meter training |
| <b>Articles examining telemonitoring</b> |                                                                                |                                                                                      |                                            |                                  |                                                               |               |                                            |                                  |
| Boaz, 2009                               | Monitor six times daily for at least 2x/week and more than 3x/day for the rest |                                                                                      |                                            |                                  |                                                               |               |                                            |                                  |
| Bujnowska-Fedak, 2011                    |                                                                                |                                                                                      |                                            | Nurse                            |                                                               |               |                                            |                                  |
| Cho, 2006                                | Depending on glucose control                                                   |                                                                                      |                                            |                                  |                                                               |               |                                            |                                  |
| Cho, 2009                                | Three times a day for insulin treated and twice daily for OHA                  |                                                                                      |                                            |                                  | Three times a day for insulin treated and twice daily for OHA |               |                                            |                                  |
| Earle, 2010                              | Four to nine times                                                             |                                                                                      |                                            |                                  |                                                               |               |                                            |                                  |
| Kim, 2016                                | Three times daily to twice weekly depending on medication and HbA1c            | Min twice weekly if HbA1c<7% & not on medications, daily for those with HbA1c<7% but | 1 week                                     |                                  |                                                               |               |                                            |                                  |

|                                                                    |                                               |                                                                                                                                       |                                                  |          |                        |                                                                  |       |  |
|--------------------------------------------------------------------|-----------------------------------------------|---------------------------------------------------------------------------------------------------------------------------------------|--------------------------------------------------|----------|------------------------|------------------------------------------------------------------|-------|--|
|                                                                    |                                               | on medications, more than once daily if HbA1c>7%, twice daily if HbA1c<7% & on insulin and min 3 times daily if HbA1c>7% & on insulin |                                                  |          |                        |                                                                  |       |  |
| Kwon, 2004                                                         |                                               | Fasting and post-prandial                                                                                                             |                                                  |          |                        |                                                                  |       |  |
| Lee, 2015                                                          | Five times per day                            | Sahur, post-2-h Sahur, midday, before breaking of fast and Iftar                                                                      | Daily                                            |          | Five times per day     | Sahur, post-2-h Sahur, midday, before breaking of fast and Iftar | Daily |  |
| Lim, 2011                                                          | Self-monitoring only                          | Eight times                                                                                                                           | ≥3 at fasting, ≥3 postprandial, and ≥2 bed-times | Trainers | Eight times            | ≥3 at fasting, ≥3 postprandial, and ≥2 bed-times                 |       |  |
|                                                                    | U-healthcare group                            |                                                                                                                                       |                                                  |          |                        |                                                                  |       |  |
| Luley, 2011                                                        | Daily                                         |                                                                                                                                       |                                                  |          |                        |                                                                  |       |  |
| Nicolucci, 2015                                                    |                                               |                                                                                                                                       |                                                  | Nurse    |                        |                                                                  |       |  |
| Or, 2016                                                           |                                               |                                                                                                                                       |                                                  |          |                        |                                                                  |       |  |
| Pressman, 2014                                                     |                                               |                                                                                                                                       |                                                  |          |                        |                                                                  |       |  |
| Quinn, 2011                                                        | Home monitoring with feedback                 | System driven based upon blood glucose results                                                                                        |                                                  |          |                        | As recommended by physician                                      |       |  |
|                                                                    | As above with unanalysed feedback from doctor |                                                                                                                                       |                                                  |          |                        |                                                                  |       |  |
|                                                                    | As above with feedback on treatment           |                                                                                                                                       |                                                  |          |                        |                                                                  |       |  |
| Tildesley, 2011                                                    | At least 3 times daily                        |                                                                                                                                       |                                                  |          | At least 3 times daily |                                                                  |       |  |
| Yoo, 2009                                                          | Twice daily                                   | Before breakfast and bedtime                                                                                                          | Daily                                            |          |                        |                                                                  |       |  |
| <b>Articles examining telecase-management &amp; telemonitoring</b> |                                               |                                                                                                                                       |                                                  |          |                        |                                                                  |       |  |

|                                                              |                                            |                                                                     |                                                                       |                                                         |       |                          |                                              |        |  |
|--------------------------------------------------------------|--------------------------------------------|---------------------------------------------------------------------|-----------------------------------------------------------------------|---------------------------------------------------------|-------|--------------------------|----------------------------------------------|--------|--|
| Anzaldo-Campos, 2016                                         | Peer support and care management           |                                                                     |                                                                       |                                                         |       |                          |                                              |        |  |
|                                                              | Peer support, care management & monitoring | Twice daily for 1 <sup>st</sup> month, then twice weekly thereafter | Fasting and post prandial                                             | Daily for first month and two days in a week thereafter | Nurse |                          |                                              |        |  |
| Del Prato, 2012                                              |                                            | Six target readings                                                 | Pre and 2h post breakfast , lunch and supper                          | 2 days                                                  |       | Six target readings      | Pre and 2h post breakfast , lunch and supper | 2 days |  |
| Kim, 2008                                                    |                                            | Minimum once weekly                                                 | Breakfast, lunch and dinner                                           |                                                         |       |                          |                                              |        |  |
| Kim, 2009                                                    |                                            |                                                                     |                                                                       |                                                         |       |                          |                                              |        |  |
| McMahon, 2005                                                |                                            | Min 3 times                                                         |                                                                       |                                                         |       |                          |                                              |        |  |
| McMahon, 2012                                                | Online care group                          | Individualized according to patient glucose levels                  |                                                                       |                                                         |       |                          |                                              |        |  |
|                                                              | Telephone care group                       |                                                                     |                                                                       |                                                         |       |                          |                                              |        |  |
| Orsama, 2013                                                 |                                            | Three days each week                                                | Pre and post prandial                                                 |                                                         |       |                          |                                              |        |  |
| Rodriguez-Idigoras, 2009                                     |                                            |                                                                     |                                                                       |                                                         |       |                          |                                              |        |  |
| Stone, 2010                                                  |                                            | At least once daily                                                 |                                                                       | Daily                                                   |       |                          |                                              |        |  |
| Stone, 2012                                                  | Care coordination calls                    |                                                                     |                                                                       |                                                         |       |                          |                                              |        |  |
|                                                              | Active care with home monitoring           | At least once daily                                                 |                                                                       | Daily                                                   |       |                          |                                              |        |  |
| Waki, 2014                                                   |                                            | Twice daily                                                         |                                                                       |                                                         |       |                          |                                              |        |  |
| <b>Articles examining teleeducation &amp; telemonitoring</b> |                                            |                                                                     |                                                                       |                                                         |       |                          |                                              |        |  |
| Chen, 2011                                                   |                                            | Once or twice daily                                                 | Fasting plasma glucose, pre-lunch or pre dinner and 2 h post prandial |                                                         |       |                          |                                              |        |  |
| Faridi, 2008                                                 |                                            | Once daily                                                          | Upon awakening                                                        | Daily                                                   |       |                          |                                              |        |  |
| Greenwood, 2015                                              |                                            |                                                                     | Before and 2 hours post meal                                          |                                                         |       | None specified           |                                              |        |  |
| Karhula, 2015                                                |                                            | At least once weekly                                                |                                                                       |                                                         |       |                          |                                              |        |  |
| Lim, 2016                                                    |                                            | At least 8 times a week                                             | Min 3 fasting, 3 post-prandial, 2 at bedtime                          | 1 week                                                  |       | At least 8 times a week  | Min 3 fasting, 3 post-prandial, 2 at bedtime | 1 week |  |
| Steventon, 2015                                              |                                            | Up to 5 days per week                                               | Same time each day                                                    | Five                                                    |       | As agreed with physician |                                              |        |  |
| Tang, 2013                                                   |                                            |                                                                     |                                                                       |                                                         |       |                          |                                              |        |  |

|                    |                |                             |  |  |  |  |  |  |  |
|--------------------|----------------|-----------------------------|--|--|--|--|--|--|--|
| Wakefield,<br>2011 | High intensity | As directed by<br>physician |  |  |  |  |  |  |  |
|                    | Low intensity  | As directed by<br>physician |  |  |  |  |  |  |  |

SMBG- Self-monitoring of blood glucose

**Table S7: Details of the action(s) taken based upon results from glucose monitoring**

| Author                                   | Intervention                                                      |                                |                      |                                                                                                                 | Control                                |                                |                 |                      |
|------------------------------------------|-------------------------------------------------------------------|--------------------------------|----------------------|-----------------------------------------------------------------------------------------------------------------|----------------------------------------|--------------------------------|-----------------|----------------------|
|                                          | Action taken according to SMBG results                            | Parameter / Trigger for action | Interventionist      | Area of changes made                                                                                            | Action taken according to SMBG results | Parameter / Trigger for action | Interventionist | Area of changes made |
| <b>Articles examining telemonitoring</b> |                                                                   |                                |                      |                                                                                                                 |                                        |                                |                 |                      |
| Boaz, 2009                               | Text message and call to patient on medical advice                | 50 to 280 mg/dL                | Diabetes nurse       | Titration of insulin dose, oral medication                                                                      |                                        |                                |                 |                      |
| Bujnowska-Fedak, 2011                    | Call to patient on medical advice                                 | 50 to 280 mg/dL                | General practitioner | Titration of insulin dose, oral medications, diet,                                                              |                                        |                                |                 |                      |
| Cho, 2006                                | Appropriate recommendations based upon glucose data every 2 weeks |                                |                      | As required including referral to nurse or dietician for issues related to self-management or lifestyle changes |                                        |                                |                 |                      |
| Cho, 2009                                | Recommendation by Internet                                        |                                |                      |                                                                                                                 | Recommendation by SMS                  |                                |                 |                      |

|                 |                                                                                       |                                                                       |                                     |                                                                                                           |                                                                                                           |                                         |                 |                         |
|-----------------|---------------------------------------------------------------------------------------|-----------------------------------------------------------------------|-------------------------------------|-----------------------------------------------------------------------------------------------------------|-----------------------------------------------------------------------------------------------------------|-----------------------------------------|-----------------|-------------------------|
| Earle, 2010     | Recommendations to alter treatment and letter to GP                                   |                                                                       |                                     | Alter treatment                                                                                           |                                                                                                           |                                         |                 |                         |
| Kim, 2016       | Recommendations on blood glucose control or telephone calls                           |                                                                       |                                     |                                                                                                           |                                                                                                           |                                         |                 |                         |
| Kwon, 2004      | Recommendation based upon history, smoking habits, laboratory data and glucose levels |                                                                       | Endocrinologist, nurses, dieticians | Medication dosage change, Lifestyle modification and medical nutrition therapy                            | Recommendation during the 2-3 clinic visits which could include dietary advice and lifestyle modification | As determined by clinician during visit | Endocrinologist | Lifestyle modifications |
| Lee, 2015       | Feedback on blood results and goal setting                                            | $\leq 3.9$ mmol/l and $\geq 11.1$ mmol/l.                             |                                     | Goal setting                                                                                              |                                                                                                           |                                         |                 |                         |
| Lim, 2011       | Automated messages which were patients specific based upon glucose results            | $<4$ mmol/L or $>8$ mmol/L                                            |                                     | Changes to medications, lifestyle advice,                                                                 |                                                                                                           |                                         |                 |                         |
| Luley, 2011     | Weekly reports sent to patients to motivate them                                      |                                                                       |                                     |                                                                                                           |                                                                                                           |                                         |                 |                         |
| Nicolucci, 2015 | Monthly calls to patient                                                              | When patients forget to enter or predefined alarm values are recorded | Nurse                               | Self-monitoring results, barriers to compliance, causes of inadequate metabolic or blood pressure control |                                                                                                           |                                         |                 |                         |
| Or, 2016        | Abnormal readings display                                                             |                                                                       |                                     |                                                                                                           |                                                                                                           |                                         |                 |                         |
| Pressman, 2014  | Weekly messages to patients                                                           |                                                                       | Care-manager                        | Educational message                                                                                       |                                                                                                           |                                         |                 |                         |
| Quinn, 2011     | Monitoring with feedback                                                              | Electronic action plan every 2.5 month prior to clinic visit          | Diabetes educators                  | Educational, behavioural, and motivational message                                                        | Electronic action plan every 2.5 month prior to clinic visit                                              |                                         |                 |                         |
|                 | As above with unanalysed feedback from doctor                                         |                                                                       |                                     |                                                                                                           |                                                                                                           |                                         |                 |                         |
|                 | As above with feedback on treatment                                                   |                                                                       |                                     |                                                                                                           |                                                                                                           |                                         |                 |                         |
| Tildesley, 2011 |                                                                                       |                                                                       |                                     | Change in insulin dosage, testing frequency,                                                              |                                                                                                           |                                         |                 |                         |

|                                                                               |                                                                                                 |                                        |  |                                                |                                                                      |  |  |  |  |
|-------------------------------------------------------------------------------|-------------------------------------------------------------------------------------------------|----------------------------------------|--|------------------------------------------------|----------------------------------------------------------------------|--|--|--|--|
|                                                                               |                                                                                                 |                                        |  |                                                | motivational message                                                 |  |  |  |  |
| Yoo , 2009 <b>Articles examining telecase management &amp; telemonitoring</b> | Immediate feedback message                                                                      |                                        |  |                                                | Variable, but include motivational, reminders or educational message |  |  |  |  |
| <b>Articles examining telecase management &amp; telemonitoring</b>            |                                                                                                 |                                        |  |                                                |                                                                      |  |  |  |  |
| Anzaldo-Campos, 2016                                                          | Peer support and care management                                                                |                                        |  |                                                |                                                                      |  |  |  |  |
|                                                                               | Peer support, care management & monitoring                                                      | Identification of low or high readings |  |                                                |                                                                      |  |  |  |  |
| Del Prato, 2012                                                               | Dosage adjustment of metformin up to 2g/day                                                     | >5.6mmol/L                             |  |                                                | Medications                                                          |  |  |  |  |
| Kim, 2008                                                                     | Feedback based upon reported data including dosage adjustment and motivational messages         |                                        |  | Diabetic educator, Nursing college academician | Medication, exercise, education and self-monitoring                  |  |  |  |  |
| Kim, 2009                                                                     | Monthly measurement reports generated to facilitate communication between participant and nurse |                                        |  |                                                | Problem solving on patient issues and emotional support              |  |  |  |  |



|                                                              |                                  |                                                                                         |                                |                           |                                                               |  |  |  |  |
|--------------------------------------------------------------|----------------------------------|-----------------------------------------------------------------------------------------|--------------------------------|---------------------------|---------------------------------------------------------------|--|--|--|--|
| McMahon, 2005                                                |                                  | Respond to any queries by patients and communicated to primary care provider on results |                                | Diabetes educator         | Glucose treatment algorithm                                   |  |  |  |  |
| McMahon, 2012                                                | Online care group                | Reinforcement of modification advice and medication change                              |                                | Nurse, Pharmacist         | Medication, Lifestyle and nutritional advice                  |  |  |  |  |
|                                                              | Telephone care group             |                                                                                         |                                |                           |                                                               |  |  |  |  |
| Orsama, 2013                                                 |                                  | Specific algorithm and feedback based upon reported data                                |                                |                           | Motivational, behavioural skills to support patient care      |  |  |  |  |
| Rodriguez-Idigoras, 2009                                     |                                  | Alarm to call centre                                                                    |                                | Physician, Diabetes nurse | Standard protocol (not specified)                             |  |  |  |  |
| Stone, 2010                                                  |                                  | Individualized telephone call                                                           |                                | Nurse practitioner        | Self-management education                                     |  |  |  |  |
| Stone, 2012                                                  | Care coordination calls          |                                                                                         |                                |                           |                                                               |  |  |  |  |
|                                                              | Active care with home monitoring | Individualized telephone call                                                           | <50mg/dL or >300mg/dL for 72hr | Nurse practitioner        | Self-management education                                     |  |  |  |  |
| Waki, 2014                                                   |                                  | Alerts for missed, late readings or readings outside threshold                          | <40mg/dL or >400mg/dL          |                           | Motivational                                                  |  |  |  |  |
| <b>Articles examining teleeducation &amp; telemonitoring</b> |                                  |                                                                                         |                                |                           |                                                               |  |  |  |  |
| Chen, 2011                                                   |                                  |                                                                                         |                                | Diabetes educator         | Education and insulin dosage adjustment                       |  |  |  |  |
| Faridi, 2008                                                 |                                  |                                                                                         |                                |                           | Tailored feedback and reminders                               |  |  |  |  |
| Greenwood, 2015                                              |                                  | Feedback on glucose results                                                             | <50mg/dL or >450mg/dL          |                           | SMBG trend, patterns and goals, medication option and changes |  |  |  |  |
| Karhula, 2015                                                |                                  |                                                                                         |                                |                           | Knowledge on chronic disease                                  |  |  |  |  |
| Lim, 2016                                                    |                                  | Tailored message depending on glucose levels                                            |                                |                           | Dietary, exercise                                             |  |  |  |  |

|                 |                |                                                      |  |               |                                                                                                                                               |  |  |  |  |
|-----------------|----------------|------------------------------------------------------|--|---------------|-----------------------------------------------------------------------------------------------------------------------------------------------|--|--|--|--|
| Steventon, 2015 |                | Feedback from provider                               |  | Nurse, Matron | Home visit, medication titration, advice on disease management and referral to doctor                                                         |  |  |  |  |
| Tang, 2013      |                | Regular feedback on clinical variable                |  |               | Personalized educational message                                                                                                              |  |  |  |  |
| Wakefield, 2011 | High intensity | Summary data generated for review by interventionist |  | Nurse         | Additional health information, increased monitoring, compliance strategies, problem resolution facilitation or contact with subject physician |  |  |  |  |
|                 | Low intensity  |                                                      |  |               |                                                                                                                                               |  |  |  |  |

SMBG- Self-monitoring of blood glucose

**Table S8: Results of subgroup and sensitivity analysis for primary outcome**

| Subgroup                                 | No of studies | Sample size | Fixed effects (95% CI) | Random effects (95% CI) |
|------------------------------------------|---------------|-------------|------------------------|-------------------------|
| <b>Telemedicine</b>                      | 93            | 16,791      | -0.61 (-0.61 to -0.60) | -0.43 (-0.64 to -0.21)  |
| <b>Study location</b>                    |               |             |                        |                         |
| Asia                                     | 31            | 4,316       | -0.85 (-0.86 to -0.84) | -0.85 (-1.34 to -0.36)  |
| Europe                                   | 14            | 2,176       | -0.05 (-0.07 to -0.04) | -0.18 (-0.36 to 0.00)   |
| North America                            | 47            | 10,199      | -0.17 (-0.19 to -0.16) | -0.23 (-0.37 to -0.10)  |
| Australia                                | 1             | 120         | 0.60 (0.22 to 0.98)    | 0.60 (0.22 to 0.98)     |
| <b>Study sample size</b>                 |               |             |                        |                         |
| <100 participants                        | 39            | 2,292       | -0.26 (-0.30 to -0.23) | -0.52 (-0.67 to -0.36)  |
| 101-200 participants                     | 22            | 2,913       | -0.26 (-0.32 to -0.20) | -0.40 (-0.74 to -0.05)  |
| >200 participants                        | 32            | 11,606      | -0.62 (-0.62 to -0.61) | -0.31 (-0.67 to 0.05)   |
| <b>Study duration</b>                    |               |             |                        |                         |
| ≤3 months                                | 17            | 1,377       | -0.54 (-0.67 to -0.41) | -0.67 (-0.93 to -0.41)  |
| 4-6 months                               | 36            | 4,538       | -1.26 (-1.27 to -1.25) | -0.41 (-0.84 to 0.02)   |
| 7-11 months                              | 4             | 659         | -0.54 (-0.79 to -0.29) | -0.66 (-1.18 to -0.15)  |
| ≥ 12 months                              | 36            | 10,237      | -0.06 (-0.07 to -0.05) | -0.26 (-0.40 to -0.12)  |
| <b>Study participants baseline HbA1c</b> |               |             |                        |                         |
| <8.0%                                    | 48            | 5,720       | -0.22 (-0.25 to -0.19) | -0.45 (-0.59 to -0.31)  |
| ≥8.0%                                    | 45            | 8,100       | -0.60 (-0.61 to -0.60) | -0.36 (-0.73 to -0.03)  |
| <b>Medium of communication used</b>      |               |             |                        |                         |
| Telephone                                | 35            | 7,323       | -0.06 (-0.07 to -0.06) | -0.29 (-0.42 to -0.16)  |
| Computer                                 | 3             | 648         | 0.04 (-0.20 to 0.27)   | 0.04 (-0.20 to 0.27)    |
| Mobile phone                             | 7             | 781         | -1.93 (-1.94 to -1.92) | -0.47 (-1.53 to 0.58)   |
| Handheld device                          | 10            | 1,479       | -0.05 (-0.07 to -0.04) | -0.29 (-0.50 to -0.08)  |
| SMS                                      | 9             | 1,012       | -0.59 (-0.77 to -0.40) | -0.65 (-1.05 to -0.25)  |
| Web-based intervention                   | 17            | 2,528       | -0.23 (-0.27 to -0.19) | -0.49 (-0.66 to -0.31)  |
| Telephone & mobile device                | 4             | 594         | -0.25 (-0.47 to -0.03) | -0.39 (-0.96 to 0.18)   |
| Web-based & handheld device              | 4             | 1,952       | -0.34 (-0.43 to -0.24) | -0.45 (-0.68 to -0.21)  |
| Web-based & telephone                    | 3             | 428         | -0.23 (-0.42 to -0.04) | -0.37 (-0.88 to 0.13)   |
| <b>Year study conducted</b>              |               |             |                        |                         |
| Before 2000                              | 3             | 276         | -1.07 (-1.20 to -0.95) | -1.01 (-1.26 to -0.75)  |
| 2000-2004                                | 6             | 777         | 0.42 (0.31 to 0.53)    | -0.48 (-1.34 to 0.39)   |
| 2005-2009                                | 25            | 5,054       | -0.12 (-0.16 to -0.09) | -0.24 (-0.37 to -0.11)  |
| 2010 onwards                             | 58            | 10,664      | -0.62 (-0.63 to -0.62) | -0.42 (-0.70 to -0.15)  |
| <b>Telemedicine strategy</b>             |               |             |                        |                         |
| Telemonitoring                           | 14            | 1,577       | -0.49 (-0.60 to -0.39) | -0.44 (-0.66 to -0.22)  |
| Teleconsultation                         | 7             | 1,328       | -1.94 (-1.95 to -1.93) | -0.64 (-1.71 to 0.43)   |
| Tele-education                           | 26            | 4,211       | -0.28 (-0.37 to -0.19) | -0.36 (-0.58 to -0.15)  |
| Telecase-management                      | 8             | 2,620       | -0.44 (-0.52 to -0.36) | -0.28 (-0.78 to 0.22)   |
| Telementoring                            | 11            | 2,892       | -0.08 (-0.09 to -0.08) | -0.28 (-0.52 to -0.04)  |
| Tele-education & telemonitoring          | 8             | 1,540       | -0.32 (-0.42 to -0.22) | -0.35 (-0.56 to -0.14)  |
| Telecase-management & telemonitoring     | 9             | 1,194       | -0.05 (-0.07 to -0.04) | -0.54 (-0.85 to -0.23)  |

|                                      |    |        |                        |                        |
|--------------------------------------|----|--------|------------------------|------------------------|
| Tele-education & telecase-management | 9  | 1,409  | 0.04 ( 0.02 to 0.06)   | -0.31 (-0.51 to -0.10) |
| <b>Independent medication change</b> |    |        |                        |                        |
| Allowed                              | 30 | 5,443  | -0.13 (-0.15 to -0.12) | -0.35 (-0.51 to -0.20) |
| Not allowed / Not reported           | 62 | 11,428 | -0.69 (-0.69 to -0.68) | -0.43 (-0.71 to -0.14) |

## Table S9 – Results of the network meta-analyses

All estimates are presented as weighted mean difference (WMD) with the corresponding 95% confidence intervals. Comparisons between treatments should be read from column to row and the estimate is in the cell in common between the column-defining treatment and the row-defining treatment. Weighted mean difference that are negative favor the column-defining treatment. To obtain odds ratios for comparisons in the opposite direction, reciprocals should be taken. All significant results are presented in bold and underlined.

**Table S9a: Pairwise meta-analyses and network meta-analyses of the various telemedicine strategies on glycosylated haemoglobin. Results of effectiveness of intervention are presented as mean difference ( 95% confidence interval) for each pairwise comparison of intervention, based on direct evidence alone (lower-left triangle) or direct and indirect evidence (upper right triangle)**

|                                              |                                             |                         |                                             |                                             |                       |                                             |                                             |                                             |                                               |
|----------------------------------------------|---------------------------------------------|-------------------------|---------------------------------------------|---------------------------------------------|-----------------------|---------------------------------------------|---------------------------------------------|---------------------------------------------|-----------------------------------------------|
| Usual care                                   | <b><u>-0.37</u></b><br><b>(-0.59,-0.15)</b> | -0.24<br>(-0.61,0.14)   | <b><u>-0.71</u></b><br><b>(-1.23,-0.20)</b> | <b><u>-0.40</u></b><br><b>(-0.70,-0.11)</b> | -0.28<br>(-0.61,0.04) | <b><u>-0.41</u></b><br><b>(-0.79,-0.02)</b> | <b><u>-0.58</u></b><br><b>(-0.96,-0.19)</b> | <b><u>-0.43</u></b><br><b>(-0.80,-0.06)</b> | -1.20<br>(-2.70,0.30)                         |
| <b><u>-0.36</u></b><br><b>(-0.58, -0.15)</b> | Teleeducation                               | 0.13<br>(-0.29,0.55)    | -0.35<br>(-0.91,0.21)                       | -0.03<br>(-0.40,0.34)                       | 0.09<br>(-0.31,0.48)  | -0.04<br>(-0.48,0.41)                       | -0.21<br>(-0.65,0.24)                       | -0.06<br>(-0.49,0.36)                       | -0.83<br>(-2.35,0.69)                         |
| -0.28<br>(-0.78, 0.22)                       | -0.40<br>(-1.03, 0.23)                      | Telecase-<br>management | -0.48<br>(-1.11,0.16)                       | -0.16<br>(-0.64,0.31)                       | -0.04<br>(-0.54,0.45) | -0.17<br>(-0.71,0.37)                       | -0.34<br>(-0.87,0.20)                       | -0.19<br>(-0.72,0.33)                       | -0.96<br>(-2.51,0.59)                         |
| -0.64<br>(-1.71, 0.43)                       | ND                                          | ND                      | Teleconsultation                            | 0.31<br>(-0.28,0.91)                        | 0.43<br>(-0.18,1.04)  | 0.31<br>(-0.34,0.95)                        | 0.14<br>(-0.50,0.78)                        | 0.28<br>(-0.35,0.92)                        | -0.49<br>(-2.07,1.10)                         |
| <b><u>-0.44</u></b><br><b>(-0.66, -0.22)</b> | ND                                          | ND                      | ND                                          | Telemonitoring                              | 0.12<br>(-0.32,0.56)  | -0.01<br>(-0.48,0.47)                       | -0.17<br>(-0.66,0.31)                       | -0.03<br>(-0.50,0.44)                       | -0.80<br>(-2.33,0.73)                         |
| <b><u>-0.28</u></b><br><b>(-0.52, -0.04)</b> | ND                                          | ND                      | ND                                          | ND                                          | Telementoring         | -0.12<br>(-0.63,0.38)                       | -0.29<br>(-0.80,0.21)                       | -0.15<br>(-0.64,0.34)                       | -0.92<br>(-2.45,0.62)                         |
| <b><u>-0.35</u></b><br><b>(-0.56, -0.14)</b> | ND                                          | ND                      | ND                                          | 0.02<br>(-0.37, 0.41)                       | ND                    | Teleeducation &<br>telemonitoring           | -0.17<br>(-0.71,0.38)                       | -0.02<br>(-0.56,0.51)                       | -0.79<br>(-2.34,0.76)                         |
| <b><u>-0.54</u></b><br><b>(-0.85, -0.23)</b> | -0.16<br>(-0.70, 0.38)                      | ND                      | ND                                          | ND                                          | ND                    | ND                                          | Telecase-<br>management &<br>Telemonitoring | 0.14<br>(-0.39,0.68)                        | -0.62<br>(-2.18,0.93)                         |
| <b><u>-0.31</u></b><br><b>(-0.51, -0.10)</b> | ND                                          | ND                      | ND                                          | ND                                          | ND                    | ND                                          | ND                                          | Teleeducation &<br>Telecase-<br>management  | -0.77<br>(-2.32,0.78)                         |
| <b><u>-1.20</u></b><br><b>(-2.30, -0.10)</b> | ND                                          | ND                      | ND                                          | ND                                          | ND                    | ND                                          | ND                                          | ND                                          | Telecase-<br>management &<br>Teleconsultation |

ND- No data

Lower left results compare row-defining intervention against column-defining intervention. Upper right results compare column-defining intervention against row-defining interventions.

**Table S9b: Network estimated weighted mean difference (95% confidence interval) of different telemedicine strategies on fasting plasma glucose**

|            |                                             |                                             |                                             |                                             |                                      |                                     |
|------------|---------------------------------------------|---------------------------------------------|---------------------------------------------|---------------------------------------------|--------------------------------------|-------------------------------------|
| Usual care | <b><u>-0.71</u></b><br><b>(-1.35,-0.07)</b> | <b><u>-1.77</u></b><br><b>(-2.76,-0.77)</b> | <b><u>-0.82</u></b><br><b>(-1.46,-0.19)</b> | <b><u>-1.24</u></b><br><b>(-2.18,-0.30)</b> | -0.26<br>(-1.69,1.16)                | -0.70<br>(-2.27,0.87)               |
|            | Teleeducation                               | -1.06<br>(-2.24,0.12)                       | -0.11<br>(-1.02,0.79)                       | -0.53<br>(-1.67,0.60)                       | 0.45<br>(-1.11,2.01)                 | 0.01<br>(-1.69,1.71)                |
|            |                                             | Telecase-management                         | 0.95<br>(-0.24,2.13)                        | 0.53<br>(-0.84,1.90)                        | 1.51<br>(-0.23,3.24)                 | 1.07<br>(-0.79,2.93)                |
|            |                                             |                                             | Telemonitoring                              | -0.42<br>(-1.56,0.72)                       | 0.56<br>(-1.00,2.12)                 | 0.12<br>(-1.57,1.82)                |
|            |                                             |                                             |                                             | Teleeducation & Telemonitoring              | 0.98<br>(-0.73,2.69)                 | 0.54<br>(-1.29,2.37)                |
|            |                                             |                                             |                                             |                                             | Telecase-management & Telemonitoring | -0.44<br>(-2.56,1.68)               |
|            |                                             |                                             |                                             |                                             |                                      | Teleeducation & Telecase-management |

**Table S9c: Network estimated weighted mean difference (95% confidence interval) of different telemedicine strategies on systolic blood pressure**

|            |                                      |                       |                                   |                       |                                   |                                |                                      |                                     |
|------------|--------------------------------------|-----------------------|-----------------------------------|-----------------------|-----------------------------------|--------------------------------|--------------------------------------|-------------------------------------|
| Usual care | <b>-3.74</b><br><b>(-5.89,-1.59)</b> | -2.73<br>(-5.55,0.09) | -0.28<br>(-2.73,2.17)             | -0.41<br>(-3.02,2.19) | 0.93<br>(-0.93,2.78)              | -2.65<br>(-5.95,0.65)          | -1.98<br>(-5.54,1.58)                | 1.09<br>(-2.32,4.51)                |
|            | Teleeducation                        | 1.01<br>(-2.38,4.40)  | <b>3.46</b><br><b>(0.21,6.71)</b> | 3.33<br>(-0.06,6.72)  | <b>4.67</b><br><b>(1.84,7.50)</b> | 1.09<br>(-2.89,5.07)           | 1.76<br>(-2.39,5.91)                 | <b>4.84</b><br><b>(0.74,8.93)</b>   |
|            |                                      | Telecase-management   | 2.45<br>(-1.29,6.18)              | 2.32<br>(-1.53,6.16)  | <b>3.66</b><br><b>(0.28,7.03)</b> | 0.08<br>(-4.28,4.43)           | 0.75<br>(-3.79,5.29)                 | 3.83<br>(-0.63,8.28)                |
|            |                                      |                       | Teleconsultation                  | -0.13<br>(-3.72,3.46) | 1.21<br>(-1.85,4.27)              | -2.37<br>(-6.53,1.79)          | -1.70<br>(-6.01,2.61)                | 1.38<br>(-2.89,5.65)                |
|            |                                      |                       |                                   | Telemonitoring        | 1.34<br>(-1.87,4.55)              | -2.24<br>(-6.37,1.88)          | -1.57<br>(-5.99,2.85)                | 1.51<br>(-2.67,5.69)                |
|            |                                      |                       |                                   |                       | Telementoring                     | -3.58<br>(-7.39,0.23)          | -2.91<br>(-6.92,1.10)                | 0.17<br>(-3.76,4.09)                |
|            |                                      |                       |                                   |                       |                                   | Teleeducation & telemonitoring | 0.67<br>(-4.21,5.56)                 | 3.75<br>(-0.73,8.22)                |
|            |                                      |                       |                                   |                       |                                   |                                | Telecase-management & Telemonitoring | 3.08<br>(-1.90,8.06)                |
|            |                                      |                       |                                   |                       |                                   |                                |                                      | Teleeducation & Telecase-management |



**Table S9d: Network estimated weighted mean difference (95% confidence interval) of different telemedicine strategies on diastolic blood pressure**

|            |                                                    |                       |                                                    |                                                 |                                                 |                                                 |                                                    |                                                  |
|------------|----------------------------------------------------|-----------------------|----------------------------------------------------|-------------------------------------------------|-------------------------------------------------|-------------------------------------------------|----------------------------------------------------|--------------------------------------------------|
| Usual care | <b><u>-1.67</u></b><br><b><u>(-3.08,-0.26)</u></b> | -1.65<br>(-3.37,0.06) | <b><u>-4.77</u></b><br><b><u>(-7.02,-2.51)</u></b> | -0.90<br>(-2.80,1.00)                           | 1.16<br>(-0.16,2.47)                            | -0.90<br>(-3.32,1.53)                           | -1.66<br>(-3.87,0.55)                              | 3.00<br>(-0.92,6.92)                             |
|            | Teleeducation                                      | 0.01<br>(-2.12,2.14)  | <b><u>-3.10</u></b><br><b><u>(-5.82,-0.37)</u></b> | 0.76<br>(-1.57,3.09)                            | <b><u>2.83</u></b><br><b><u>(0.91,4.74)</u></b> | 0.77<br>(-2.02,3.56)                            | 0.01<br>(-2.62,2.63)                               | <b><u>4.67</u></b><br><b><u>(0.50,8.83)</u></b>  |
|            |                                                    | Telecase-management   | <b><u>-3.11</u></b><br><b><u>(-5.98,-0.24)</u></b> | 0.75<br>(-1.79,3.29)                            | <b><u>2.81</u></b><br><b><u>(0.66,4.97)</u></b> | 0.76<br>(-2.21,3.72)                            | -0.01<br>(-2.81,2.80)                              | <b><u>4.65</u></b><br><b><u>(0.38,8.93)</u></b>  |
|            |                                                    |                       | Teleconsultation                                   | <b><u>3.86</u></b><br><b><u>(0.79,6.94)</u></b> | <b><u>5.92</u></b><br><b><u>(3.26,8.59)</u></b> | <b><u>3.87</u></b><br><b><u>(0.50,7.24)</u></b> | 3.10<br>(-0.04,6.25)                               | <b><u>7.77</u></b><br><b><u>(3.24,12.29)</u></b> |
|            |                                                    |                       |                                                    | Telemonitoring                                  | 2.06<br>(-0.22,4.34)                            | 0.01<br>(-3.04,3.05)                            | -0.76<br>(-3.68,2.17)                              | 3.90<br>(-0.45,8.26)                             |
|            |                                                    |                       |                                                    |                                                 | Telementoring                                   | -2.06<br>(-4.80,0.69)                           | <b><u>-2.82</u></b><br><b><u>(-5.40,-0.24)</u></b> | 1.84<br>(-2.29,5.97)                             |
|            |                                                    |                       |                                                    |                                                 |                                                 | Teleeducation & telemonitoring                  | -0.76<br>(-4.05,2.52)                              | 3.90<br>(-0.71,8.51)                             |
|            |                                                    |                       |                                                    |                                                 |                                                 |                                                 | Telecase-management & Telemonitoring               | <b><u>4.66</u></b><br><b><u>(0.16,9.16)</u></b>  |
|            |                                                    |                       |                                                    |                                                 |                                                 |                                                 |                                                    | Teleeducation & Telecase-management              |

**Table S9e: Network estimated weighted mean difference (95% confidence interval) of different telemedicine strategies on body mass index**

|            |                       |                      |                       |                                                    |                       |                                |                                      |                                     |
|------------|-----------------------|----------------------|-----------------------|----------------------------------------------------|-----------------------|--------------------------------|--------------------------------------|-------------------------------------|
| Usual care | -0.22<br>(-1.11,0.67) | 0.60<br>(-0.34,1.54) | 0.35<br>(-0.90,1.61)  | <b><u>-0.97</u></b><br><b><u>(-1.80,-0.15)</u></b> | -0.40<br>(-1.34,0.53) | -1.49<br>(-3.42,0.45)          | 0.11<br>(-1.06,1.29)                 | 0.09<br>(-1.69,1.86)                |
|            | Teleeducation         | 0.82<br>(-0.41,2.05) | 0.57<br>(-0.97,2.11)  | -0.75<br>(-1.96,0.46)                              | -0.18<br>(-1.47,1.11) | -1.27<br>(-3.39,0.86)          | 0.33<br>(-1.14,1.81)                 | 0.31<br>(-1.68,2.29)                |
|            |                       | Telecase-management  | -0.25<br>(-1.82,1.32) | <b><u>-1.57</u></b><br><b><u>(-2.82,-0.32)</u></b> | -1.00<br>(-2.33,0.32) | -2.08<br>(-4.23,0.06)          | -0.48<br>(-1.99,1.02)                | -0.51<br>(-2.52,1.50)               |
|            |                       |                      | Teleconsultation      | -1.32<br>(-2.83,0.18)                              | -0.75<br>(-2.32,0.81) | -1.84<br>(-4.14,0.47)          | -0.24<br>(-1.96,1.49)                | -0.26<br>(-2.44,1.91)               |
|            |                       |                      |                       | Telemonitoring                                     | 0.57<br>(-0.68,1.82)  | -0.51<br>(-2.61,1.59)          | 1.09<br>(-0.35,2.53)                 | 1.06<br>(-0.90,3.02)                |
|            |                       |                      |                       |                                                    | Telementoring         | -1.08<br>(-3.23,1.06)          | 0.52<br>(-0.99,2.02)                 | 0.49<br>(-1.52,2.50)                |
|            |                       |                      |                       |                                                    |                       | Teleeducation & telemonitoring | 1.60<br>(-0.66,3.86)                 | 1.57<br>(-1.05,4.20)                |
|            |                       |                      |                       |                                                    |                       |                                | Telecase-management & Telemonitoring | -0.03<br>(-2.16,2.10)               |
|            |                       |                      |                       |                                                    |                       |                                |                                      | Teleeducation & Telecase-management |

**Table S9f: Network estimated weighted mean difference (95% confidence interval) of different telemedicine strategies on total cholesterol**

|            |                       |                       |                      |                      |                                |                                      |                                     |
|------------|-----------------------|-----------------------|----------------------|----------------------|--------------------------------|--------------------------------------|-------------------------------------|
| Usual care | -0.15<br>(-0.42,0.12) | -0.03<br>(-0.50,0.44) | 0.00<br>(-0.31,0.32) | 0.01<br>(-0.50,0.53) | -0.27<br>(-1.18,0.64)          | -0.25<br>(-0.90,0.40)                | 0.12<br>(-0.58,0.83)                |
|            | Teleeducation         | 0.12<br>(-0.38,0.63)  | 0.15<br>(-0.26,0.57) | 0.16<br>(-0.42,0.74) | -0.12<br>(-1.07,0.83)          | -0.10<br>(-0.80,0.61)                | 0.27<br>(-0.48,1.03)                |
|            |                       | Telecase-management   | 0.03<br>(-0.54,0.59) | 0.04<br>(-0.66,0.73) | -0.24<br>(-1.27,0.78)          | -0.22<br>(-1.02,0.58)                | 0.15<br>(-0.70,0.99)                |
|            |                       |                       | Telemonitoring       | 0.01<br>(-0.59,0.61) | -0.27<br>(-1.24,0.69)          | -0.25<br>(-0.97,0.47)                | 0.12<br>(-0.65,0.89)                |
|            |                       |                       |                      | Telementoring        | -0.28<br>(-1.33,0.76)          | -0.26<br>(-1.09,0.57)                | 0.11<br>(-0.76,0.98)                |
|            |                       |                       |                      |                      | Teleeducation & telemonitoring | 0.02<br>(-1.10,1.14)                 | 0.39<br>(-0.76,1.54)                |
|            |                       |                       |                      |                      |                                | Telecase-management & Telemonitoring | 0.37<br>(-0.59,1.33)                |
|            |                       |                       |                      |                      |                                |                                      | Teleeducation & Telecase-management |

**Table S9g: Network estimated weighted mean difference (95% confidence interval) of different telemedicine strategies on low-density lipoprotein**

|            |                      |                      |                       |                       |                       |                                      |                                     |
|------------|----------------------|----------------------|-----------------------|-----------------------|-----------------------|--------------------------------------|-------------------------------------|
| Usual care | 0.00<br>(-0.13,0.13) | 0.03<br>(-0.14,0.20) | -0.20<br>(-0.40,0.00) | -0.06<br>(-0.20,0.07) | -0.06<br>(-0.24,0.13) | -0.06<br>(-0.30,0.17)                | 0.03<br>(-0.26,0.32)                |
|            | Teleeducation        | 0.03<br>(-0.17,0.22) | -0.20<br>(-0.44,0.03) | -0.07<br>(-0.26,0.12) | -0.06<br>(-0.28,0.16) | -0.07<br>(-0.33,0.20)                | 0.03<br>(-0.29,0.34)                |
|            |                      | Telecase-management  | -0.23<br>(-0.49,0.03) | -0.09<br>(-0.31,0.12) | -0.09<br>(-0.33,0.16) | -0.09<br>(-0.38,0.19)                | 0.00<br>(-0.33,0.33)                |
|            |                      |                      | Teleconsultation      | 0.14<br>(-0.10,0.37)  | 0.14<br>(-0.12,0.41)  | 0.14<br>(-0.17,0.44)                 | 0.23<br>(-0.12,0.58)                |
|            |                      |                      |                       | Telemonitoring        | 0.01<br>(-0.22,0.23)  | 0.00<br>(-0.27,0.27)                 | 0.09<br>(-0.22,0.41)                |
|            |                      |                      |                       |                       | Telementoring         | -0.01<br>(-0.30,0.29)                | 0.09<br>(-0.25,0.43)                |
|            |                      |                      |                       |                       |                       | Telecase-management & Telemonitoring | 0.09<br>(-0.28,0.46)                |
|            |                      |                      |                       |                       |                       |                                      | Teleeducation & Telecase-management |

**Table S9h: Network estimated weighted mean difference (95% confidence interval) of different telemedicine strategies on high-density lipoprotein**

|            |                      |                      |                                                 |                                                    |                                                    |                                                    |                                                    |
|------------|----------------------|----------------------|-------------------------------------------------|----------------------------------------------------|----------------------------------------------------|----------------------------------------------------|----------------------------------------------------|
| Usual care | 0.01<br>(-0.04,0.06) | 0.01<br>(-0.08,0.09) | <b><u>0.70</u></b><br><b><u>(0.51,0.88)</u></b> | 0.00<br>(-0.05,0.06)                               | -0.06<br>(-0.14,0.03)                              | <b><u>-0.13</u></b><br><b><u>(-0.23,-0.03)</u></b> | 0.10<br>(-0.11,0.31)                               |
|            | Teleeducation        | 0.00<br>(-0.09,0.09) | <b><u>0.69</u></b><br><b><u>(0.50,0.89)</u></b> | 0.00<br>(-0.08,0.07)                               | -0.07<br>(-0.16,0.03)                              | <b><u>-0.14</u></b><br><b><u>(-0.25,-0.03)</u></b> | 0.09<br>(-0.12,0.31)                               |
|            |                      | Telecase-management  | <b><u>0.69</u></b><br><b><u>(0.49,0.89)</u></b> | 0.00<br>(-0.10,0.10)                               | -0.07<br>(-0.19,0.05)                              | <b><u>-0.14</u></b><br><b><u>(-0.27,-0.01)</u></b> | 0.09<br>(-0.13,0.32)                               |
|            |                      |                      | Teleconsultation                                | <b><u>-0.69</u></b><br><b><u>(-0.89,-0.50)</u></b> | <b><u>-0.76</u></b><br><b><u>(-0.96,-0.55)</u></b> | <b><u>-0.83</u></b><br><b><u>(-1.04,-0.62)</u></b> | <b><u>-0.60</u></b><br><b><u>(-0.88,-0.32)</u></b> |
|            |                      |                      |                                                 | Telemonitoring                                     | -0.06<br>(-0.17,0.04)                              | <b><u>-0.14</u></b><br><b><u>(-0.25,-0.02)</u></b> | 0.10<br>(-0.12,0.31)                               |
|            |                      |                      |                                                 |                                                    | Telementoring                                      | -0.07<br>(-0.20,0.06)                              | 0.16<br>(-0.06,0.38)                               |
|            |                      |                      |                                                 |                                                    |                                                    | Telecase-management & Telemonitoring               | 0.23<br>(0.00,0.46)                                |
|            |                      |                      |                                                 |                                                    |                                                    |                                                    | Teleeducation & Telecase-management                |

**Table S9i: Network estimated weighted mean difference (95% confidence interval) of different telemedicine strategies on triglycerides**

|            |                                      |                      |                       |                       |                                   |                                |                                      |                                     |
|------------|--------------------------------------|----------------------|-----------------------|-----------------------|-----------------------------------|--------------------------------|--------------------------------------|-------------------------------------|
| Usual care | <b>-0.14</b><br><b>(-0.22,-0.06)</b> | 0.01<br>(-0.14,0.17) | -0.09<br>(-0.37,0.20) | -0.02<br>(-0.15,0.12) | <b>0.20</b><br><b>(0.07,0.33)</b> | -0.17<br>(-0.56,0.22)          | -0.24<br>(-0.51,0.03)                | -0.07<br>(-0.55,0.40)               |
|            | Teleeducation                        | 0.15<br>(-0.02,0.33) | 0.06<br>(-0.24,0.35)  | 0.13<br>(-0.03,0.28)  | <b>0.34</b><br><b>(0.19,0.49)</b> | -0.03<br>(-0.42,0.37)          | -0.10<br>(-0.38,0.18)                | 0.07<br>(-0.41,0.55)                |
|            |                                      | Telecase-management  | -0.10<br>(-0.42,0.23) | -0.03<br>(-0.23,0.17) | 0.19<br>(-0.02,0.39)              | -0.18<br>(-0.60,0.24)          | -0.25<br>(-0.56,0.06)                | -0.08<br>(-0.58,0.41)               |
|            |                                      |                      | Teleconsultation      | 0.07<br>(-0.25,0.38)  | 0.29<br>(-0.03,0.60)              | -0.08<br>(-0.57,0.40)          | -0.16<br>(-0.55,0.24)                | 0.01<br>(-0.54,0.57)                |
|            |                                      |                      |                       | Telemonitoring        | <b>0.22</b><br><b>(0.03,0.40)</b> | -0.15<br>(-0.56,0.26)          | -0.23<br>(-0.52,0.07)                | -0.06<br>(-0.55,0.44)               |
|            |                                      |                      |                       |                       | Telementoring                     | -0.37<br>(-0.78,0.04)          | <b>-0.44</b><br><b>(-0.74,-0.14)</b> | -0.27<br>(-0.76,0.22)               |
|            |                                      |                      |                       |                       |                                   | Teleeducation & Telemonitoring | -0.07<br>(-0.54,0.40)                | 0.10<br>(-0.51,0.71)                |
|            |                                      |                      |                       |                       |                                   |                                | Telecase-management & Telemonitoring | 0.17<br>(-0.37,0.71)                |
|            |                                      |                      |                       |                       |                                   |                                |                                      | Teleeducation & Telecase-management |

## **Table S10: Inconsistency estimates**

In all network meta-analysis, transitivity is the crucial assumption since it permits the use of indirect evidences, i.e. permits the comparison of treatment that never been directly contrasted. To estimate the inconsistency or transitivity, we used the difference between direct and indirect estimates (called inconsistency factor IF) and the corresponding 95% CI for each IF in each closed triangular loop. An inconsistent loop is those that present inconsistency factors with 95% confidence intervals incompatible with zero. For example, for the triangular loop of evidence including usual care-teleeducation-telecase-management for total cholesterol, the weighted mean difference for estimated effect differs between direct and indirect evidence by 0.03, however the 95% confidence interval includes zero indicating the possibility of no difference.

To further supplement our analyses on transitivity, we used the design-by-treatment interaction model which provides a single inference, using the  $\chi^2$  test, about the plausibility of assuming consistency throughout the entire network

**Table S10a: Inconsistency of treatment triangular loop for each outcome network**

| <b>Closed triangular loop of evidence</b>                        | <b>Inconsistency factor<br/>(95% confidence<br/>interval)</b> | <b>Loop<br/>heterogeneity<br/><math>\tau^2</math></b> |
|------------------------------------------------------------------|---------------------------------------------------------------|-------------------------------------------------------|
| <b>Glycosylated haemoglobin</b>                                  |                                                               |                                                       |
| Usual care – Teleeducation – Telecase-management                 | 0.32 (0.00, 1.71)                                             | 0.35                                                  |
| Usual care – Teleeducation – Teleeducation & Telecase-management | 0.17 (0.00, 1.43)                                             | 0.04                                                  |
| Usual care – Telemonitoring – Teleeducation & Telemonitoring     | 0.11 (0.00, 0.91)                                             | 0.08                                                  |
| <b>Total cholesterol</b>                                         |                                                               |                                                       |
| Usual care – Teleeducation – Telecase-management                 | 0.03 (0.00, 0.70)                                             | 0.03                                                  |
| <b>Low-density lipoprotein</b>                                   |                                                               |                                                       |
| Usual care – Teleeducation – Telecase-management                 | 0.16 (0.00, 0.67)                                             | 0.03                                                  |
| <b>High-density lipoprotein</b>                                  |                                                               |                                                       |
| Usual care – Teleeducation – Telecase-management                 | 0.05 (0.00, 0.21)                                             | 0.001                                                 |
| <b>Triglyceride</b>                                              |                                                               |                                                       |
| Usual care – Teleeducation – Telecase-management                 | 0.20 (0.00, 0.73)                                             | 0.004                                                 |
| <b>Body mass index</b>                                           |                                                               |                                                       |
| Usual care – Teleeducation – Telecase-management                 | 0.84 (0.00, 3.63)                                             | 0.18                                                  |
| <b>Systolic blood pressure</b>                                   |                                                               |                                                       |
| Usual care – Teleeducation – Telecase-management                 | 4.11 (0.00, 11.87)                                            | <0.001                                                |
| <b>Diastolic blood pressure</b>                                  |                                                               |                                                       |
| Usual care – Teleeducation – Telecase-management                 | 3.83 (0.00, 10.26)                                            | 1.31                                                  |



**Table S10b: Assessment of global inconsistency in networks using the ‘design-by-treatment’ interaction model**

| <b>Network outcome</b>   | <b>Chi-square</b> | <b>P-value for test of global inconsistency</b> |
|--------------------------|-------------------|-------------------------------------------------|
| Glycosylated haemoglobin | 2.71              | 0.74                                            |
| Total cholesterol        | 0.01              | 0.91                                            |
| Low-density lipoprotein  | 0.39              | 0.53                                            |
| High-density lipoprotein | 0.18              | 0.67                                            |
| Triglyceride             | 0.53              | 0.47                                            |
| Body mass index          | 0.34              | 0.56                                            |
| Systolic blood pressure  | 0.95              | 0.33                                            |
| Diastolic blood pressure | 1.58              | 0.21                                            |

## Table S11: Summary of effect sizes comparing meta-analysis from other studies and current study

### Reference list of studies used in the current comparison

1. Flodgren G, Rachas A, Farmer AJ, et al. Interactive telemedicine: effects on professional practice and health care outcomes. *Cochrane Database of Systematic Reviews* 2015(9). Art. No.: CD002098. DOI: 10.1002/14651858.CD002098.pub2
2. Huang Z, Tao H, Meng Q, et al. Effects of telecare intervention on glycemic control in type 2 diabetes: a systematic review and meta-analysis of randomized controlled trials. *European Journal of Endocrinology* 2015;172(3):R93-R101.
3. Liang X, Wang Q, Yang X, et al. Effect of mobile phone intervention for diabetes on glycaemic control: A meta-analysis. *Diabetic Medicine* 2011;28(4):455-63.
4. Marcolino MS, Maia JX, Alkmim MBM, et al. Telemedicine application in the care of diabetes patients: Systematic review and meta-analysis. *PLoS ONE* 2013;8(11).
5. Pal K, Eastwood SV, Michie S, et al. Computer-based interventions to improve self-management in adults with type 2 diabetes: A systematic review and meta-analysis. *Diabetes Care* 2014;37(6):1759-66.
6. Polisen J, Tran K, Cimon K, et al. Home telehealth for diabetes management: a systematic review and meta-analysis. *Diabetes Obes Metab* 2009;11(10):913-30.
7. Qi L, Liu Q, Qi X, et al. Effectiveness of peer support for improving glycaemic control in patients with type 2 diabetes: a meta-analysis of randomized controlled trials. *BMC Public Health* 2015;15(1):1-11.
8. Saffari M, Ghanizadeh G, Koenig HG. Health education via mobile text messaging for glycemic control in adults with type 2 diabetes: A systematic review and meta-analysis. *Primary Care Diabetes* 2014.
9. Su D, Zhou J, Kelley MS, et al. Does telemedicine improve treatment outcomes for diabetes? A meta-analysis of results from 55 randomized controlled trials. *Diabetes Research and Clinical Practice*;116:136-48.
10. Tao D, Or CK. Effects of self-management health information technology on glycaemic control for patients with diabetes: a meta-analysis of randomized controlled trials. *Journal of Telemedicine and Telecare* 2013;19(3):133-43.
11. Verhoeven F, Tanja-Dijkstra K, Nijland N, et al. Asynchronous and synchronous teleconsultation for diabetes care: a systematic literature review. *J Diabetes Sci Technol* 2010;4(3):666-84.
12. Zhai Y-k, Zhu W-j, Cai Y-l, et al. Clinical- and Cost-effectiveness of Telemedicine in Type 2 Diabetes Mellitus: A Systematic Review and Meta-analysis. *Medicine* 2014;93(28):e312.
13. Zhang X, Yang S, Sun K, et al. How to achieve better effect of peer support among adults with type 2 diabetes: A meta-analysis of randomized clinical trials. *Patient Education and Counseling*;99(2):186-97.

**Appendix 11a: Summary of effect sizes comparing meta-analysis from other studies and from network meta-analysis on glycemic control from the current study**

| Comparison                                         | Traditional meta-analysis |                        |                    | Network meta-analysis (current study) |                    |
|----------------------------------------------------|---------------------------|------------------------|--------------------|---------------------------------------|--------------------|
|                                                    | Study, year (Reference)   | Effect size (95% CI)   | Trials included, n | Effect size (95% CI)                  | Trials included, n |
| Tele-education vs usual care                       | Saffari, 2014             | -0.60 (-0.83 to -0.36) | 10                 | -0.37 (-0.59 to -0.15)                | 26                 |
| Telemonitoring vs usual care                       | Polisena, 2009            | -0.21 (-0.35 to -0.08) | 21                 | -0.40 (-0.70 to -0.11)                | 14                 |
|                                                    | Liang, 2011               | -0.81 (-1.11 to -0.50) | 10                 |                                       |                    |
|                                                    | Flodgren, 2015            | 0.03 (-0.28 to 0.34)   | 2                  |                                       |                    |
| Telecase-management vs usual care                  | Huang, 2015               | -0.54 (-0.75 to -0.34) | 18                 | -0.24 (-0.61 to 0.14)                 | 8                  |
|                                                    | Pal, 2014                 | -0.21 (-0.37 to -0.05) | 12                 |                                       |                    |
| Teleconsultation vs usual care                     | Verhoeven, 2007           | 0.03 (-0.31 to 0.24)   | 6                  | -0.71 (-1.23 to -0.20)                | 7                  |
|                                                    | Flodgren, 2015            | -0.27 (-0.34 to -0.19) | 3                  |                                       |                    |
| Telementoring vs usual care                        | Qi, 2015                  | -0.57 (-0.78 to -0.36) | 13                 | -0.28 (-0.61 to 0.04)                 | 11                 |
|                                                    | Zhang, 2016               | -0.16 (-0.25 to -0.07) | 20                 |                                       |                    |
| Telecase-management & Telemonitoring vs usual care | Flodgren, 2015            | -0.57 (-0.73 to -0.41) | 11                 | -0.58 (-0.96 to -0.19)                | 9                  |

**Appendix 11b: Summary of effect sizes comparing meta-analysis from other studies and pairwise meta-analysis on glycemic control from the current study**

| <b>Comparison</b>                  | <b>Study, year (Reference)</b> | <b>Effect size (95% CI)</b> | <b>Trials included, n</b> | <b>Effect size (95% CI)</b> | <b>Trials included, n</b> |
|------------------------------------|--------------------------------|-----------------------------|---------------------------|-----------------------------|---------------------------|
| Telemedicine studies vs usual care | Marcolino, 2013                | -0.44 (-0.61 to -0.26)      | 6                         | -0.42 (-0.63 to -0.21)      | 92                        |
|                                    | Tao, 2013                      | -0.36 (-0.48 to -0.24)      | 32                        |                             |                           |
|                                    | Zhai, 2014                     | -0.37 (-0.49 to -0.25)      | 35                        |                             |                           |
|                                    | Flodgren, 2015                 | -0.31 (-0.37 to -0.24)      | 16                        |                             |                           |
|                                    | Su, 2016                       | -0.63                       | 31                        |                             |                           |

Figure S1: Flow chart depicts the process of study selection

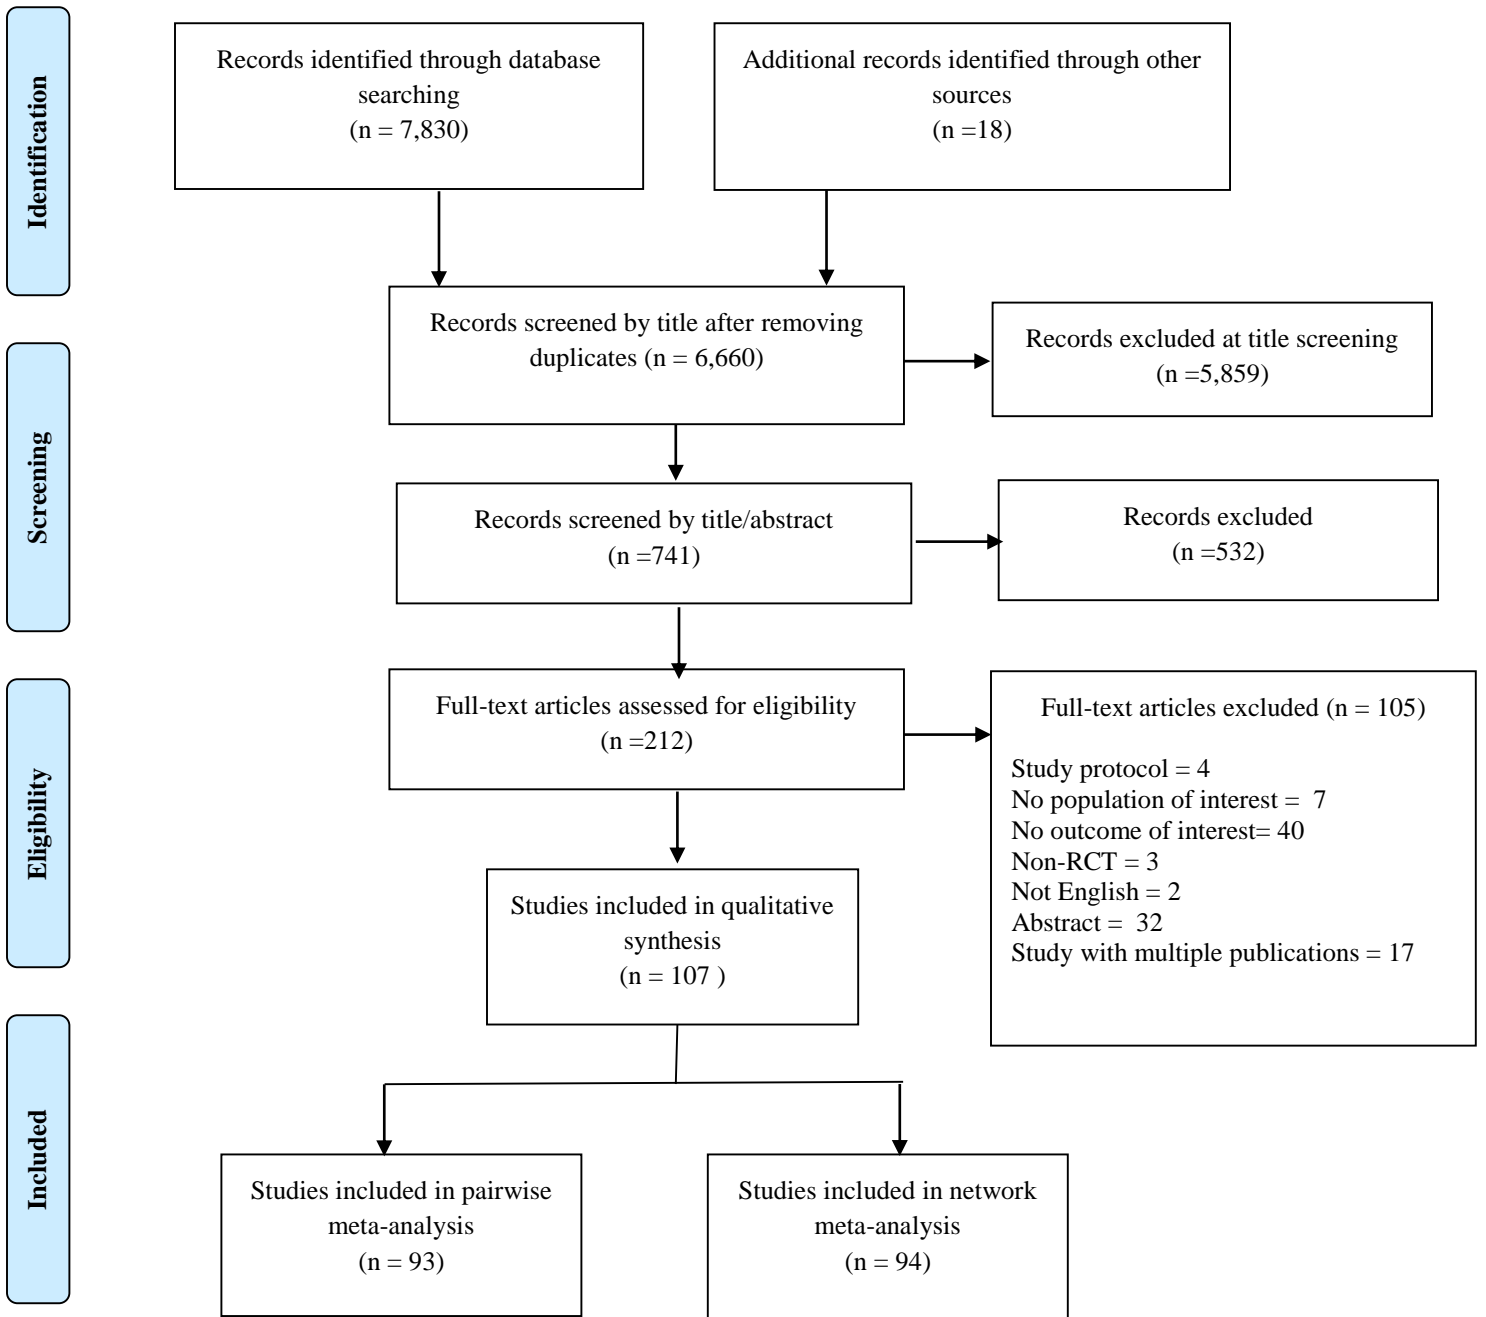

**Figure S2: Risk of bias assessment appraisal of randomized controlled studies on telemedicine using the Cochrane risk of bias tool**

To assess the risk of bias for studies included in the current study, we used the Cochrane Risk of Bias tool. This tool assessed the specific bias of seven domains including methods for generating the random sequence, allocation concealment, blinding of participants and investigators, blinding of outcome assessment, incompleteness of outcome data and selective outcome reporting. The adjudication of the risk of bias is achieved by answering pre-specified questions about the methods reported by each study in relation to the risk domain, and results are represented in a risk of bias table.

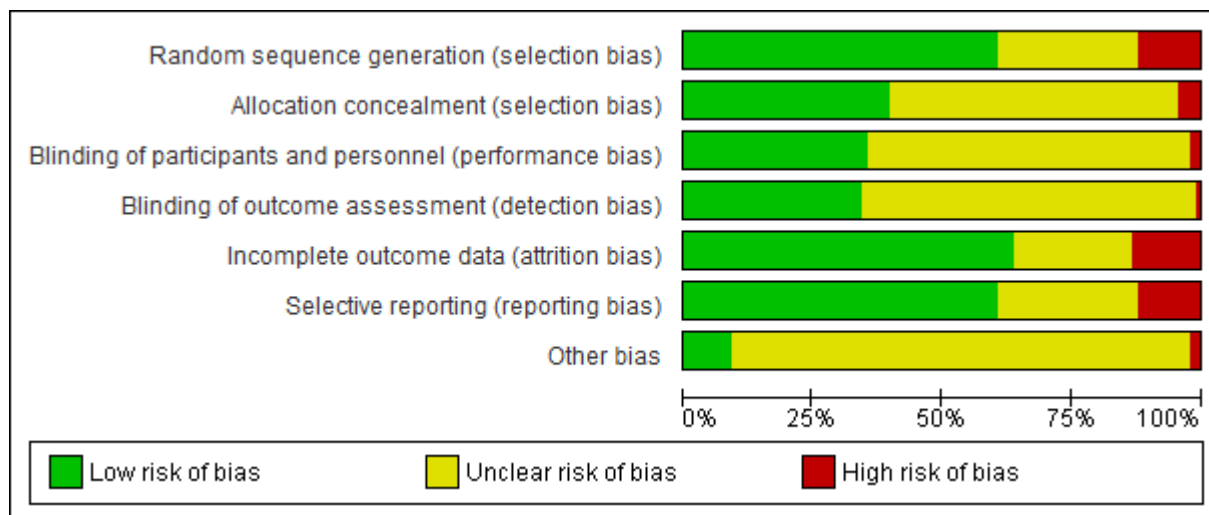

### **Figure S3 Evidence network for outcomes assessed**

The width of lines for each connection in the evidence network is proportional to the number of randomized controlled studies that compared each pair of treatment. The sizes of nodes are proportional to the number of patients. The numbers represent the number of randomized controlled studies which contribute to the direct comparison.

**Figure S3a: Evidence network of treatment comparison for primary outcome**

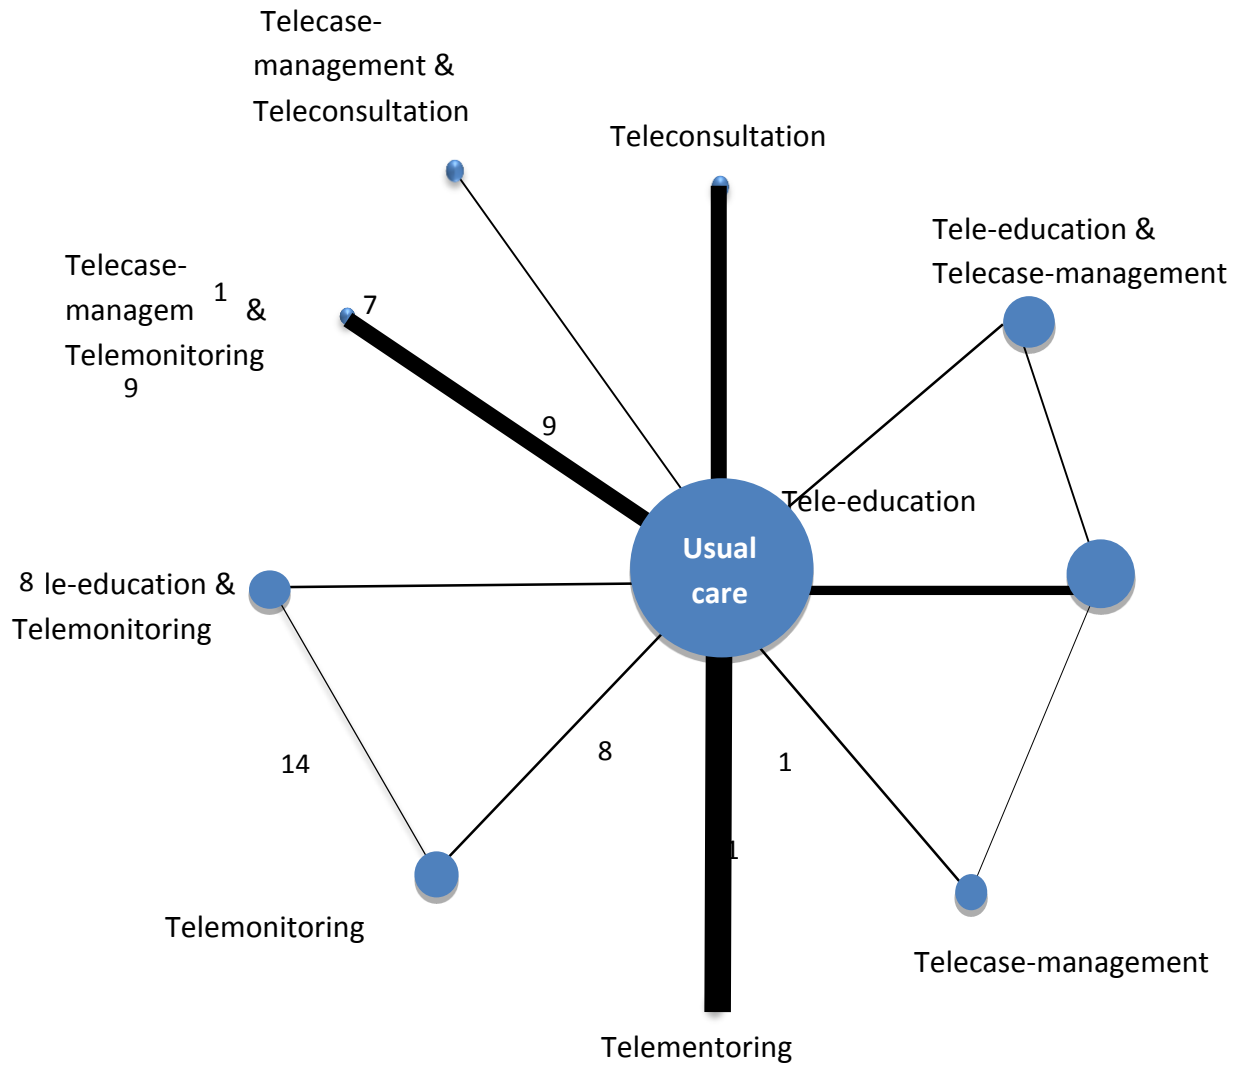

The tau value for network meta-analysis for is 0.52 (moderate heterogeneity)



**Figure S3b: Network of treatment comparison for secondary outcomes**

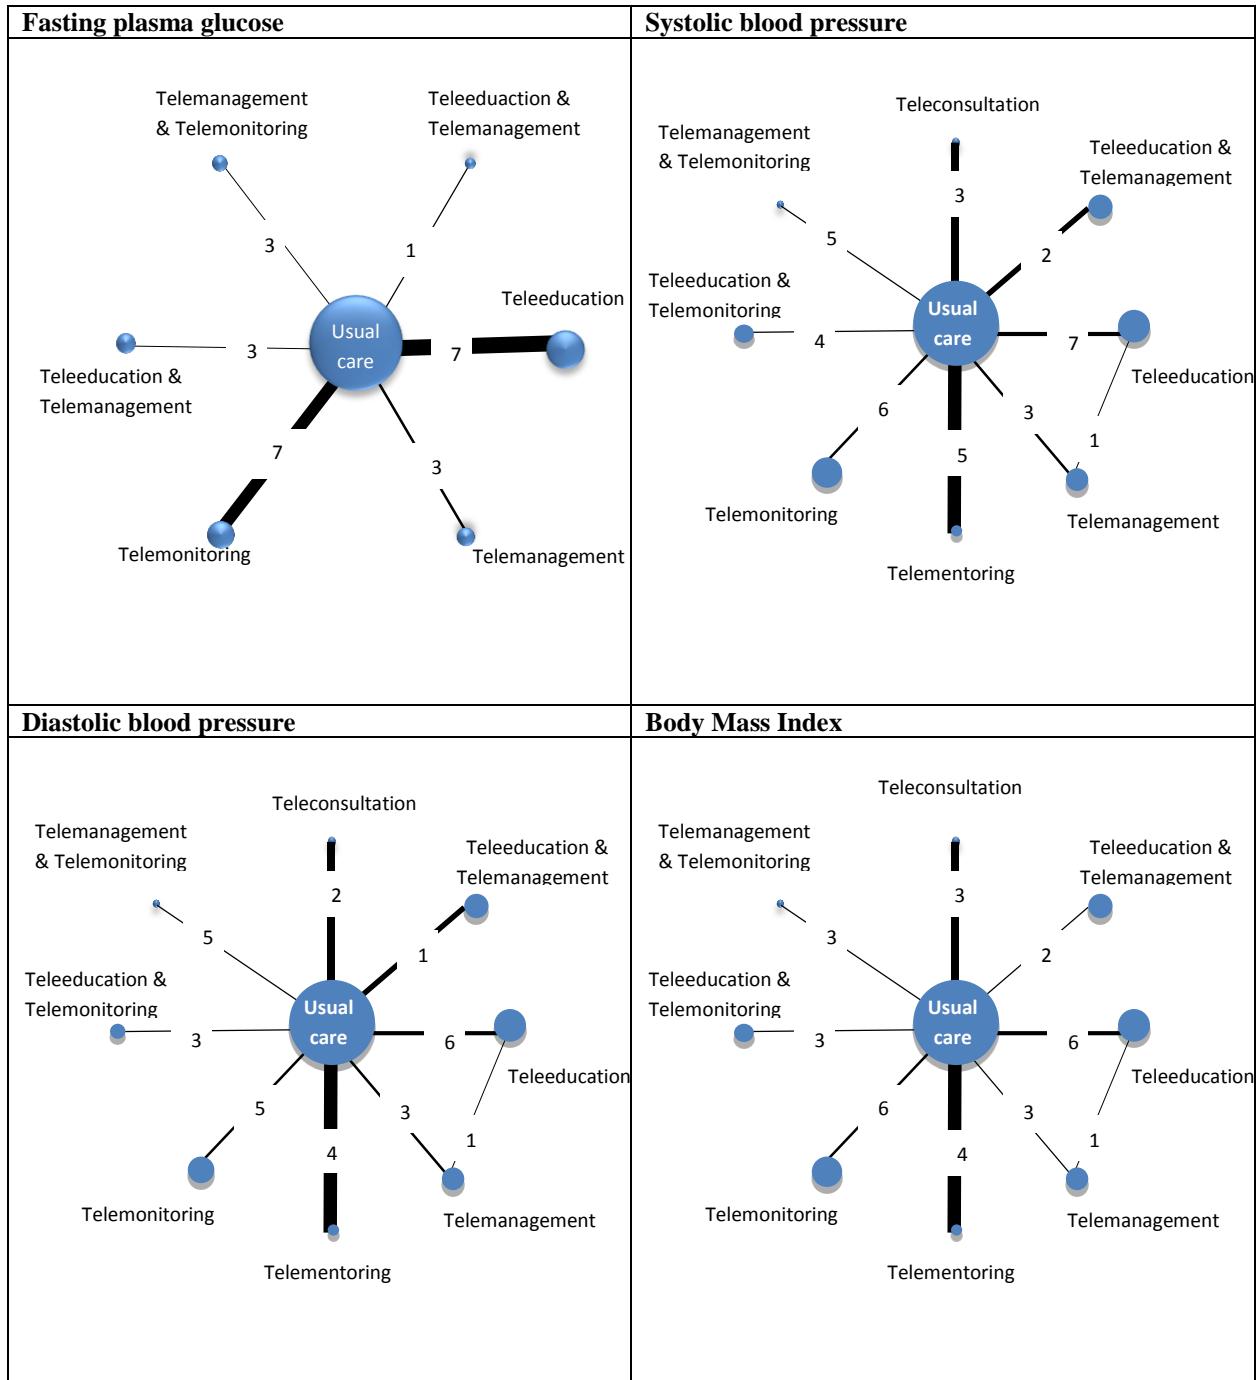

The tau value for network meta-analysis for each outcomes (an estimate of a single heterogeneity variance for the

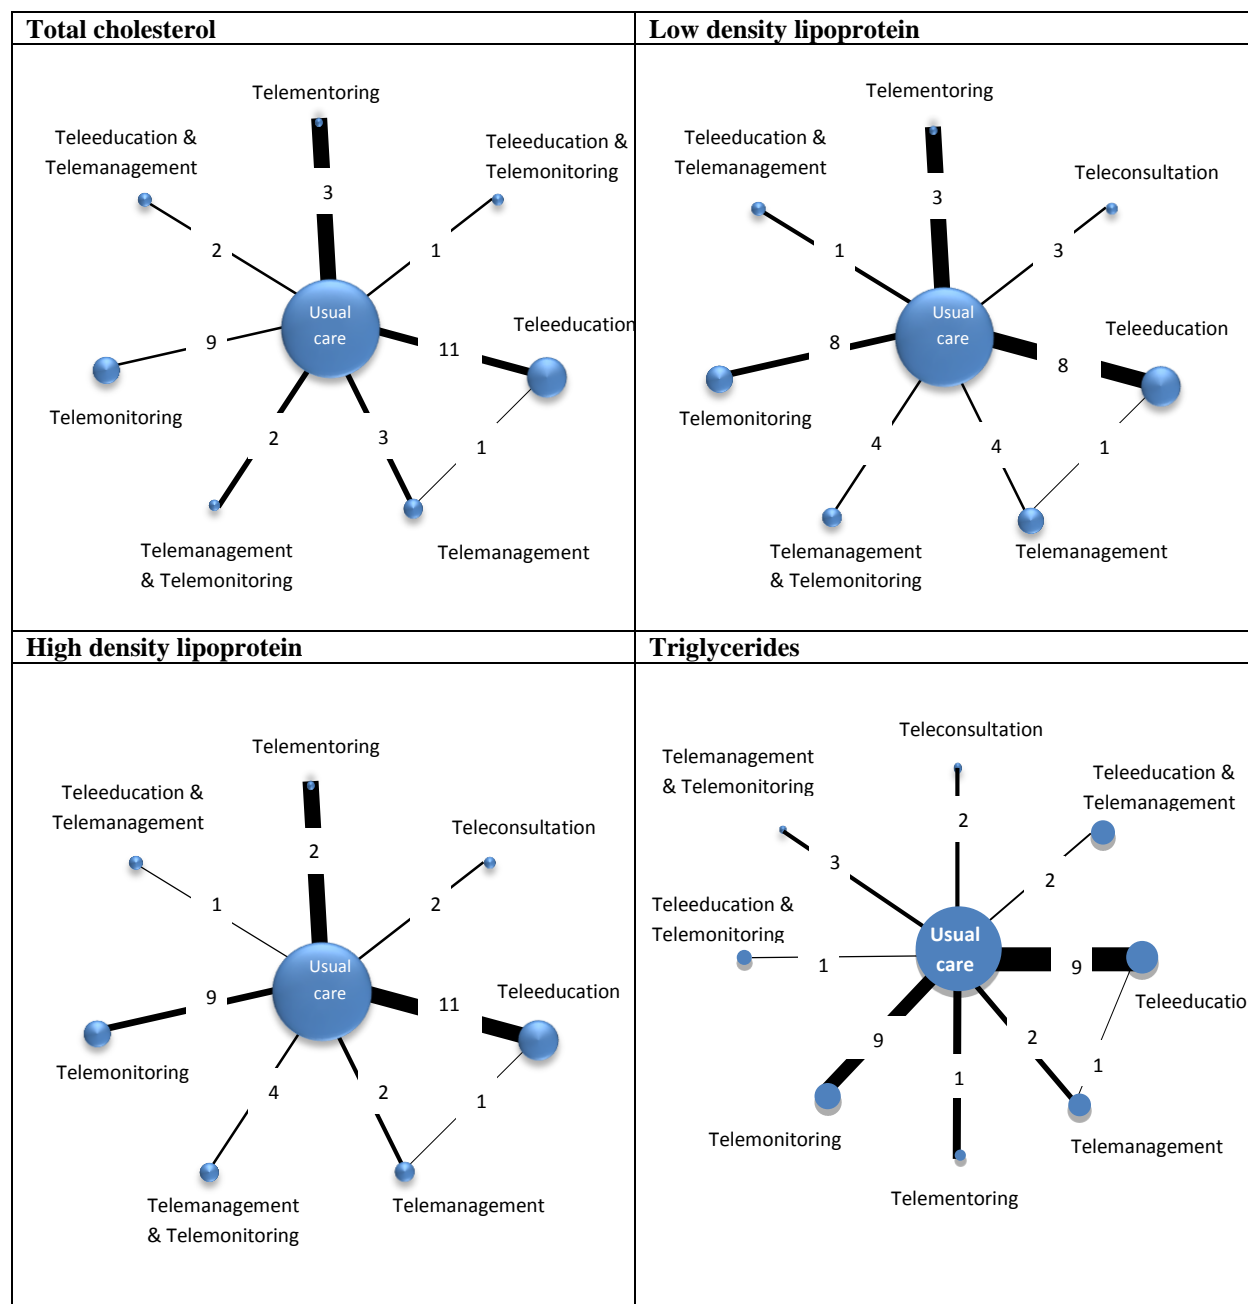

whole network) are as follow: fasting plasma glucose: 0.66 (moderate heterogeneity) systolic blood pressure  $\tau = 1.80$  (high heterogeneity) ; diastolic blood pressure,  $\tau=1.22$  (high heterogeneity); BMI,  $\tau=0.85$  (high heterogeneity); total cholesterol,  $\tau=0.44$  (moderate heterogeneity); low-density lipoprotein,  $\tau= 0.15$  (moderate heterogeneity); high-density lipoprotein,  $\tau= 0.06$  (low heterogeneity); triglycerides,  $\tau= 0.06$  (low heterogeneity).

**Figure S4: Surface under cumulative ranking curve of the various treatments for glycosylated hemoglobin. Ranking indicates probability to be the best treatment, second best and so on among the different telemedicine interventions evaluated**

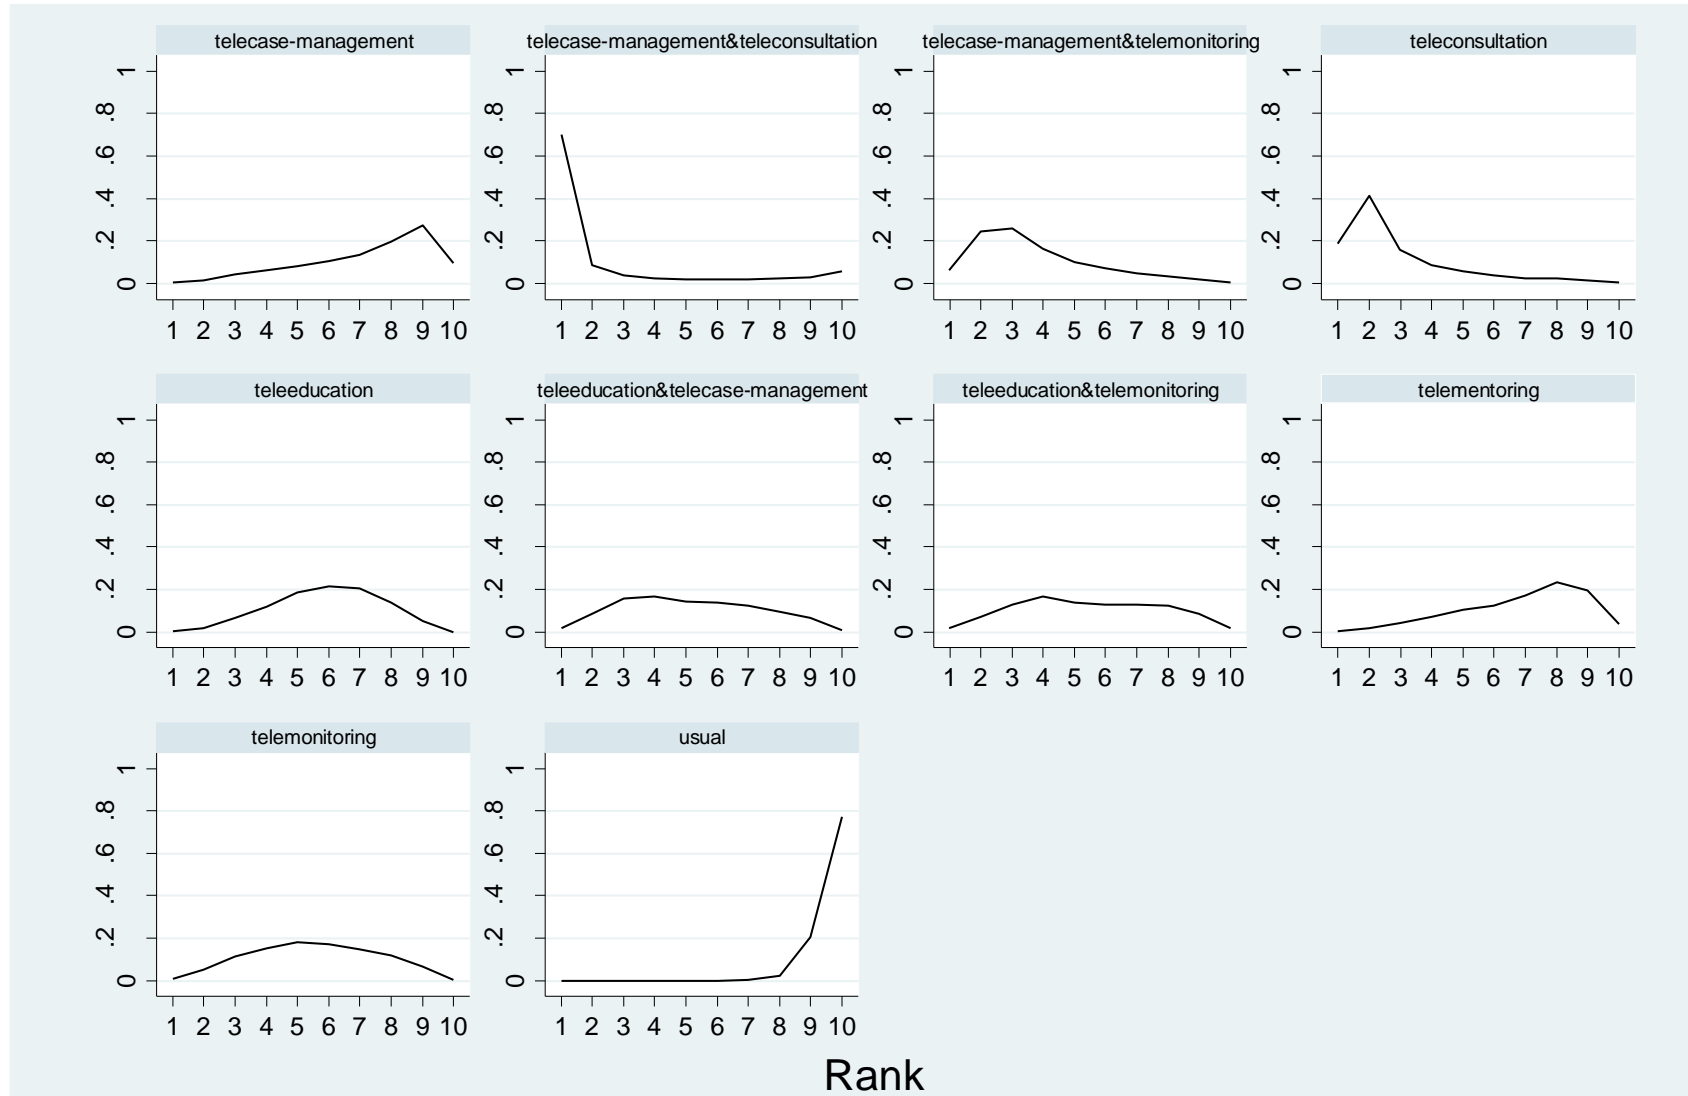

### **Figure S5: Comparison adjusted funnel plot**

Each observation represents the difference between the study estimate and its direct meta-analysis mean effect. The red line represents the null hypothesis, that is study specific effect sizes do not differ from the respective comparison specific pooled effect estimates. Studies on the right hand side 'over-estimate' the effect of active treatment. All comparisons are active treatment against usual care.

Figure S5a: Comparison adjusted funnel plot for glycosylated hemoglobin.

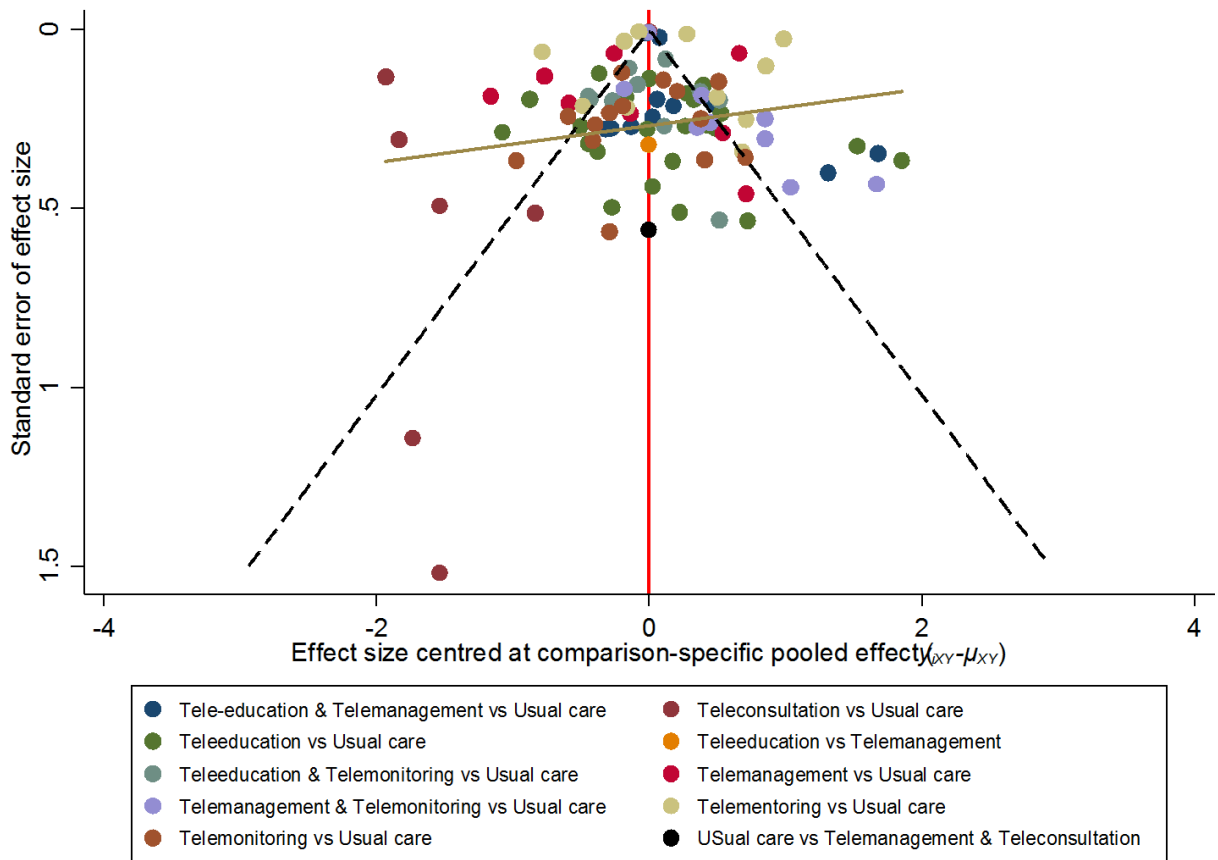

Figure S5b: Comparison adjusted funnel plot for secondary outcomes

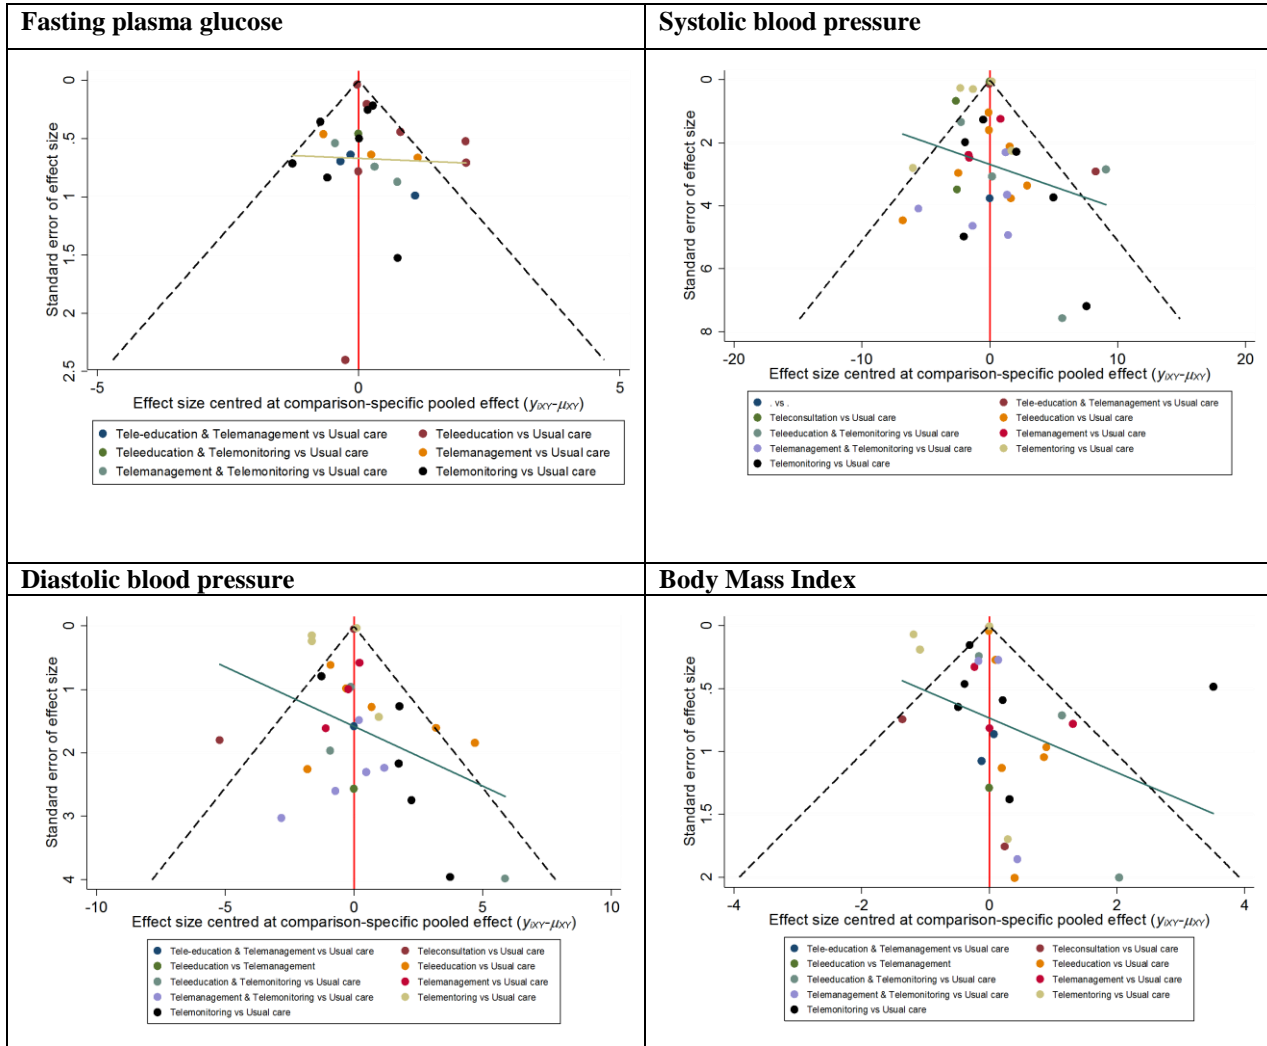

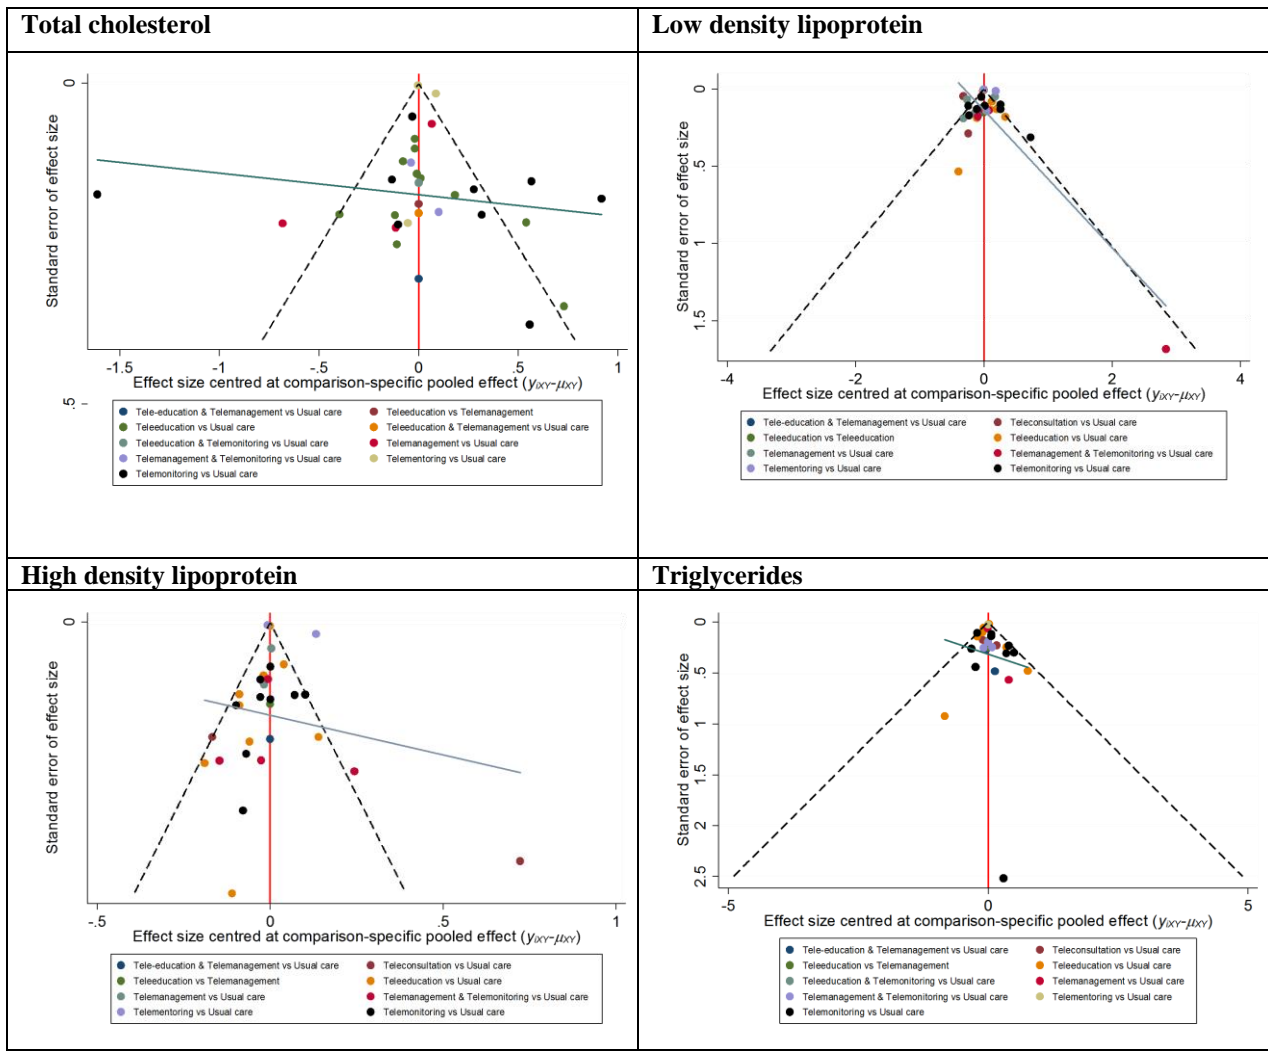

## References: List of studies included in the current review

1. Anderson DR, Christison-Lagay J, Villagra V, et al. Managing the space between visits: A randomized trial of disease management for diabetes in a community health center. *J Gen Intern Med* 2010;25(10):1116-22.
2. Anderson-Loftin W, Barnett S, Bunn P, et al. Soul Food Light: Culturally Competent Diabetes Education. *Diabetes Educator* 2005;31(4):555-63.
3. Anzaldo-Campos MC, Contreras S, Vargas-Ojeda A, et al. Dulce Wireless Tijuana: A Randomized Control Trial Evaluating the Impact of Project Dulce and Short-Term Mobile Technology on Glycemic Control in a Family Medicine Clinic in Northern Mexico. *Diabetes Technology & Therapeutics* 2016;18(4):240-51.
4. Arora S, Peters AL, Burner E, et al. Trial to examine text message-based mHealth in emergency department patients with diabetes (TEXT-MED): a randomized controlled trial. *Ann Emerg Med* 2014;63(6):745-54 e6.
5. Aubert RE, Herman WH, Waters J, et al. Nurse case management to improve glycemic control in diabetic patients in a health maintenance organization: A randomized, controlled trial. *Ann Intern Med* 1998;129(8):605-12.
6. Avdal EU, Kizilci S, Demirel N. The effects of web-based diabetes education on diabetes care results: A randomized control study. *CIN - Computers Informatics Nursing* 2011;29(2):101-06.
7. Bell AM, Fonda SJ, Walker MS, et al. Mobile phone-based video messages for diabetes self-care support. *Journal of Diabetes Science and Technology* 2012;6(2):310-19.
8. Blackberry ID, Furler JS, Best JD, et al. Effectiveness of general practice based, practice nurse led telephone coaching on glycaemic control of type 2 diabetes: The Patient Engagement and Coaching for Health (PEACH) pragmatic cluster randomised controlled trial. *BMJ (Online)* 2013;347(7926).
9. Boaz M, Hellman K, Wainstein J. An automated telemedicine system improves patient-reported well-being. *Diabetes Technology & Therapeutics* 2009;11(3):181-86.
10. Bond GE, Burr R, Wolf FM, et al. The Effects of a Web-Based Intervention on the Physical Outcomes Associated with Diabetes Among Adults Age 60 and Older: A Randomized Trial. *Diabetes Technology & Therapeutics* 2007;9(1):52-59.
11. Browning C, Chapman A, Yang H, et al. Management of type 2 diabetes in China: the Happy Life Club, a pragmatic cluster randomised controlled trial using health coaches. *BMJ Open* 2016;6(3):e009319.
12. Bujnowska-Fedak MM, Puchala E, Steciwko A. The impact of telehome care on health status and quality of life among patients with diabetes in a primary care setting in Poland. *Telemedicine journal and e-health* 2011;17(3):153-63.



13. Capozza K, Woolsey S, Georgsson M, et al. Going Mobile With Diabetes Support: A Randomized Study of a Text Message–Based Personalized Behavioral Intervention for Type 2 Diabetes Self-Care. *Diabetes Spectrum* 2015;28(2):83-91.
14. Carter EL, Nunlee-Bland G, Callender C. A Patient-Centric, Provider-Assisted Diabetes Telehealth Self-management Intervention for Urban Minorities. *Perspectives in Health Information Management* 2011;8(1):1-9.
15. Castelnuovo G, Manzoni GM, Cuzziol P, et al. TECNOB Study: Ad Interim Results of a Randomized Controlled Trial of a Multidisciplinary Telecare Intervention for Obese Patients with Type-2 Diabetes. *Clinical Practice and Epidemiology in Mental Health : CP & EMH* 2011;7:44-50.
16. Chan JC, Sui Y, Oldenburg B, et al. Effects of telephone-based peer support in patients with type 2 diabetes mellitus receiving integrated care: a randomized clinical trial. *JAMA Intern Med* 2014;174(6):972-81.
17. Chen SY, Chang YH, Hsu HC, et al. One-year efficacy and safety of the telehealth system in poorly controlled type 2 diabetic patients receiving insulin therapy. *Telemedicine journal and e-health* 2011;17(9):683-87.
18. Cho J, Chang S, Kwon H, et al. Long-term effect of the Internet-based glucose monitoring system on HbA1c reduction and glucose stability: a 30-month follow-up study for diabetes management with ubiquitous medical care system. *Diabetes Care* 2006;29(12):2625-31.
19. Cho J, Lee H, Lim D, et al. Mobile communication using a mobile phone with a glucometer for glucose control in Type 2 patients with diabetes: as effective as an Internet-based glucose monitoring system. *Journal of Telemedicine & Telecare* 2009;15(2):77-82.
20. Cho JH, Kwon HS, Kim HS, et al. Effects on diabetes management of a health-care provider mediated, remote coaching system via a PDA-type glucometer and the Internet. *Journal of Telemedicine and Telecare* 2011;17(7):365-70.
21. Ciemins E, Coon P, Peck R, et al. Using telehealth to provide diabetes care to patients in rural Montana: Findings from the Promoting Realistic Individual Self-Management Program (PRISM). *Diabetes Technology and Therapeutics* 2013;15(SUPPL.1):S70.
22. Crowley MJ, Powers BJ, Olsen MK, et al. The Cholesterol, Hypertension, And Glucose Education (CHANGE) study: Results from a randomized controlled trial in African Americans with diabetes. *American Heart Journal*;166(1):179-86.e2.
23. Dale J, Caramlau I, Sturt J, et al. Telephone peer-delivered intervention for diabetes motivation and support: The telecare exploratory RCT. *Patient Education & Counseling* 2009;75(1):91-98.
24. Dang TNT, Deoisres W, Keeratiyutawong P, et al. Effectiveness of a diabetes self-management support intervention in Vietnamese adults with type 2 diabetes. *Journal of Science, Technology and Humanities* 2013;11(1):13-23.
25. Davis RM, Hitch AD, Salaam MM, et al. TeleHealth improves diabetes self-management in an underserved community: diabetes TeleCare. *Diabetes Care* 2010;33(8):1712-7.
26. Del Prato S, Nicolucci A, Lovagnini-Scher AC, et al. Telecare provides comparable efficacy to conventional self-monitored blood glucose in patients with type 2 diabetes titrating one injection of insulin glulisine-the ELEONOR study. *Diabetes Technology and Therapeutics* 2012;14(2):175-82.

27. Earle KA, Istepanian RS, Zitouni K, et al. Mobile telemonitoring for achieving tighter targets of blood pressure control in patients with complicated diabetes: a pilot study. *Diabetes Technol Ther* 2010;12(7):575-9.
28. Faridi Z, Liberti L, Shuval K, et al. Evaluating the impact of mobile telephone technology on type 2 diabetic patients' self-management: The NICHE pilot study. *Journal of Evaluation in Clinical Practice* 2008;14(3):465-69.
29. Glasgow R, La Chance P, Toobert D, et al. Long-term effects and costs of brief behavioural dietary intervention for patients with diabetes delivered from the medical office. *Patient Education & Counseling* 1997;32(3):175-84.
30. Glasgow RE, Nutting PA, Toobert DJ, et al. Effects of a brief computer-assisted diabetes self-management intervention on dietary, biological and quality-of-life outcomes. *Chronic Illness* 2006;2(1):27-38.
31. Glasgow R, Kurz D, King D, et al. Outcomes of minimal and moderate support versions of an Internet-based diabetes self-management support program. *Journal of General Internal Medicine* 2010;25(12):1315-22.
32. Goodarzi M, Ebrahimzadeh I, Rabi A, et al. Impact of distance education via mobile phone text messaging on knowledge, attitude, practice and self efficacy of patients with type 2 diabetes mellitus in Iran. *Journal of Diabetes and Metabolic Disorders* 2012;11(1):1-8.
33. Graziano JA, Gross CR. A randomized controlled trial of an automated telephone intervention to improve glycemic control in type 2 diabetes. *Advances in Nursing Science* 2009;32(3):E42-E57.
34. Greenwood DA, Blozis SA, Young HM, et al. Overcoming Clinical Inertia: A Randomized Clinical Trial of a Telehealth Remote Monitoring Intervention Using Paired Glucose Testing in Adults With Type 2 Diabetes. *Journal of medical Internet research* 2015;17(7):e178.
35. Heisler M, Vijan S, Makki F, et al. Diabetes control with reciprocal peer support versus nurse care management: a randomized trial. *Ann Intern Med* 2010;153(8):507-15.
36. Holmen H, Torbjørnsen A, Wahl KA, et al. A mobile health intervention for self-management and lifestyle change for persons with type 2 diabetes, Part 2: One-year results from the Norwegian Randomized Controlled Trial RENEWING HEALTH. *JMIR mHealth uHealth* 2014;2(4):e57.
37. Hsu WC, Lau KHK, Huang R, et al. Utilization of a cloud-based diabetes management program for insulin initiation and titration enables collaborative decision making between healthcare providers and patients. *Diabetes technology & therapeutics* 2016;18(2):59-67.
38. Huizinga MM, Gebretsadik T, Garcia Ulen C, et al. Preventing glycaemic relapse in recently controlled type 2 diabetes patients: A randomised controlled trial. *Diabetologia* 2010;53(5):832-39.
39. Hussein WI, Hasan K, Jaradat AA. Effectiveness of mobile phone short message service on diabetes mellitus management; the SMS-DM study. *Diabetes Research and Clinical Practice* 2011;94(1):e24-e26.
40. Islam SMS, Niessen LW, Ferrari U, et al. Effects of Mobile Phone SMS to Improve Glycemic Control Among Patients With Type 2 Diabetes in Bangladesh: A Prospective, Parallel-Group, Randomized Controlled Trial. *Diabetes Care* 2015;38(8):e112-e13.
41. Karhula T, Vuorinen A-L, Rääpysjärvi K, et al. Telemonitoring and Mobile Phone-Based Health Coaching Among Finnish Diabetic and Heart Disease Patients: Randomized Controlled Trial. *Journal of Medical Internet Research* 2015;17(6):e153.

42. Keyserling TC, Samuel-Hodge CD, Ammerman AS, et al. A Randomized Trial of an Intervention to Improve Self-Care Behaviors of African-American Women With Type 2 Diabetes. Impact on physical activity 2002;25(9):1576-83.
43. Kim H, Oh J. Adherence to diabetes control recommendations: impact of nurse telephone calls. Journal of Advanced Nursing 2003;44(3):256-61.
44. Kim SI, Kim HS. Effectiveness of mobile and internet intervention in patients with obese type 2 diabetes. International Journal of Medical Informatics 2008;77(6):399-404.
45. Kim MT, Han HR, Song HJ, et al. A community-based, culturally tailored behavioral intervention for Korean Americans with type 2 diabetes. Diabetes Educator 2009;35(6):986-94.
46. Kim H-S, Sun C, Yang SJ, et al. Randomized, Open-label, Parallel Group Study to Evaluate the Effect of Internet-based Glucose Management System on Subjects with Diabetes in China. Telemedicine and e-Health 2016.
47. Kwon HS, Cho JH, Kim HS, et al. Development of web-based diabetic patient management system using short message service (SMS). Diabetes Res Clin Pract 2004;66 Suppl 1:S133-7.
48. Lee T-I, Yeh Y-T, Liu C-T, et al. Development and evaluation of a patient-oriented education system for diabetes management. International Journal of Medical Informatics 2007;76(9):655-63.
49. Lee JY, Lee SWH, Nasir NH, et al. Diabetes telemonitoring reduces the risk of hypoglycaemia during Ramadan: a pilot randomized controlled study. Diabetic Medicine 2015;32(12):1658-61.
50. Leichter SB, Bowman K, Adkins RA, et al. Impact of remote management of diabetes via computer: the 360 study--a proof-of-concept randomized trial. Diabetes Technol Ther 2013;15(5):434-8.
51. Leu MG, Norris TE, Hummel J, et al. A randomized, controlled trial of an automated wireless messaging system for diabetes. Diabetes Technol Ther 2005;7(5):710-18.
52. Lim S, Kang SM, Shin H, et al. Improved glycemic control without hypoglycemia in elderly diabetic patients using the ubiquitous healthcare service, a new medical information system. Diabetes Care 2011;34(2):308-13.
53. Lim S, Kang SM, Kim KM, et al. Multifactorial intervention in diabetes care using real-time monitoring and tailored feedback in type 2 diabetes. Acta Diabetologica 2016;53(2):189-98.
54. Liou JK, Soon MS, Chen CH, et al. Shared care combined with telecare improves glycemic control of diabetespatients in a rural, underserved community. Journal of Diabetes Science and Technology 2014;20(2):175-78.
55. Lorig K, Ritter PL, Villa F, et al. Spanish diabetes self-management with and without automated telephone reinforcement: two randomized trials. Diabetes Care 2008;31(3):408-14.
56. Long JA, Jahnle EC, Richardson DM, et al. Peer Mentoring and Financial Incentives to Improve Glucose Control in African American Veterans: A Randomized, Controlled Trial. Annals of internal medicine 2012;156(6):416-24.

57. Luley C, Blaik A, Reschke K, et al. Weight loss in obese patients with type 2 diabetes: Effects of telemonitoring plus a diet combination - The Active Body Control (ABC) Program. *Diabetes Research & Clinical Practice* 2011;91(3):286-92.
58. Maljanian R, Grey N, Staff I, et al. Intensive telephone follow-up to a hospital-based disease management model for patients with diabetes mellitus. *Disease Management* 2005;8(1):15-25.
59. McKay H, Glasgow RE, Feil EG, et al. Internet-based diabetes self-management and support: Initial outcome from the Diabetes Network Project. *Rehabilitation Psychology* 2002;47(1):31-48.
60. McMahon GT, Gomes HE, Hickson Hohne S, et al. Web-based care management in patients with poorly controlled diabetes. *Diabetes Care* 2005;28(7):1624-9.
61. McMahon GT, Fonda SJ, Gomes HE, et al. A randomized comparison of online- and telephone-based care management with internet training alone in adult patients with poorly controlled type 2 diabetes. *Diabetes technology & therapeutics* 2012;14(11):1060-67.
62. Nagrebetsky A, Larsen M, Craven A, et al. Stepwise self-titration of oral glucose-lowering medication using a mobile telephone-based telehealth platform in type 2 diabetes: A feasibility trial in primary care. *Journal of Diabetes Science and Technology* 2013;7(1):123-34.
63. Nesari M, Zakerimoghadam M, Rajab A, et al. Effect of telephone follow-up on adherence to a diabetes therapeutic regimen. *Japan journal of nursing science : JJNS* 2010;7(2):121-28.
64. Nicolucci A, Cercone S, Chiriatti A, et al. A Randomized Trial on Home Telemonitoring for the Management of Metabolic and Cardiovascular Risk in Patients with Type 2 Diabetes. *Diabetes technology & therapeutics* 2015;17(8):563-70.
65. Noh JH, Cho YJ, Nam HW, et al. Web-based comprehensive information system for self-management of diabetes mellitus. *Diabetes technology & therapeutics* 2010;12(5):333-37.
66. Oh JA, Kim HS, Yoon KH, et al. A telephone-delivered intervention to improve glycemic control in type 2 diabetic patients. *Yonsei Medical Journal* 2003;44(1):1-8.
67. Or C, Tao D. A 3-Month Randomized Controlled Pilot Trial of a Patient-Centered, Computer-Based Self-Monitoring System for the Care of Type 2 Diabetes Mellitus and Hypertension. *Journal of Medical Systems* 2016;40(4):1-13.
68. Orsama AL, Lahteenmaki J, Harno K, et al. Active assistance technology reduces glycosylated hemoglobin and weight in individuals with type 2 diabetes: Results of a theory-based randomized trial. *Diabetes Technology and Therapeutics* 2013;15(8):662-69.
69. Peimani M, Rambod C, Omidvar M, et al. Effectiveness of short message service-based intervention (SMS) on self-care in type 2 diabetes: A feasibility study. *Primary Care Diabetes*.
70. Piette JD, Weinberger M, McPhee SJ, et al. Do automated calls with nurse follow-up improve self-care and glycemic control among vulnerable patients with diabetes? *The American journal of medicine* 2000;108(1):20-7.

71. Piette JD, Weinberger M, Kraemer FB, et al. Impact of automated calls with nurse follow-up on diabetes treatment outcomes in a Department of Veterans Affairs health care system: A randomized controlled trial. *Diabetes Care* 2001;24(2):202-08.
72. Piette JD, Richardson C, Himle J, et al. A randomized trial of telephonic counseling plus walking for depressed diabetes patients. *Medical Care* 2011;49(7):641-48.
73. Plotnikoff R, Karunamuni N, Courneya K, et al. The Alberta Diabetes and Physical Activity Trial (ADAPT): A randomized trial evaluating theory-based interventions to increase physical activity in adults with type 2 diabetes. *Annals of Behavioral Medicine* 2013;45(1):45-56.
74. Pressman AR, Kinoshita L, Kirk S, et al. A novel telemonitoring device for improving diabetes control: protocol and results from a randomized clinical trial. *Telemed J E Health* 2014;20(2):109-14.
75. Quinn CC, Shardell MD, Terrin ML, et al. Cluster-randomized trial of a mobile phone personalized behavioral intervention for blood glucose control. *Diabetes Care* 2011;34(9):1934-42.
76. Ralston JD, Hirsch IB, Hoath J, et al. Web-Based Collaborative Care for Type 2 Diabetes: A pilot randomized trial. *Diabetes Care* 2009;32(2):234-39.
77. Rasmussen O, Lauszus F, Loekke M. Telemedicine compared with standard care in type 2 diabetes mellitus: A randomized trial in an outpatient clinic. *Journal of Telemedicine and Telecare* 2015.
78. Rodríguez-Idígoras MI, Sepúlveda-Muñoz J, Sánchez-Garrido-Escudero R, et al. Telemedicine influence on the follow-up of type 2 diabetes patients. *Diabetes technology & therapeutics* 2009;11(7):431-37.
79. Sacco WP, Malone JI, Morrison AD, et al. Effect of a brief, regular telephone intervention by paraprofessionals for type 2 diabetes. *Journal of Behavioral Medicine* 2009;32(4):349-59.
80. Samuel-Hodge CD, Keyserling TC, France R, et al. A Church-based Diabetes Self-management Education Program for African Americans With Type 2 Diabetes. *Preventing Chronic Disease* 2006;3(3):A93.
81. Schillinger D, Handley M, Wang F, et al. Effects of Self-Management Support on Structure, Process, and Outcomes Among Vulnerable Patients With Diabetes: A three-arm practical clinical trial. *Diabetes Care* 2009;32(4):559-66.
82. Shahid M, Mahar S, Shaikh S, et al. Mobile phone intervention to improve diabetes care in rural areas of Pakistan: a randomized controlled trial. *J Coll Physicians Surg Pak* 2015;25(3):166-71.
83. Shea S, Weinstock RS, Teresi JA, et al. A randomized trial comparing telemedicine case management with usual care in older, ethnically diverse, medically underserved patients with diabetes mellitus: 5 year results of the IDEATel study. *J Am Med Inform Assoc* 2009;16(4):446-56.
84. Shetty A, Chamukuttan S, Nanditha A, et al. Reinforcement of adherence to prescription recommendations in Asian Indian diabetes patients using short message service (SMS)-a pilot study. *J Assoc Physicians India* 2011;59:711-14.
85. Smith SA, Shah ND, Bryant SC, et al. Chronic care model and shared care in diabetes: randomized trial of an electronic decision support system. *Mayo Clinic proceedings* 2008;83(7):747-57.

86. Spencer MS, Rosland A-M, Kieffer EC, et al. Effectiveness of a Community Health Worker Intervention Among African American and Latino Adults With Type 2 Diabetes: A Randomized Controlled Trial. *American journal of public health* 2011;101(12):2253-60
87. Steventon A, Bardsley M, Doll H, et al. Effect of telehealth on glycaemic control: analysis of patients with type 2 diabetes in the Whole Systems Demonstrator cluster randomised trial. *BMC Health Services Research* 2014;14:334-34.
88. Stone RA, Rao RH, Sevick MA, et al. Active care management supported by home telemonitoring in veterans with type 2 diabetes: The DiaTel randomized controlled trial. *Diabetes Care* 2010;33(3):478-84.
89. Stone RA, Sevick MA, Rao RH, et al. The Diabetes Telemonitoring Study Extension: an exploratory randomized comparison of alternative interventions to maintain glycemic control after withdrawal of diabetes home telemonitoring. *J Am Med Inform Assoc* 2012;19(6):973-9.
90. Tang PC, Overhage JM, Chan AS, et al. Online disease management of diabetes: Engaging and motivating patients online with enhanced resources-diabetes (EMPOWER-D), a randomized controlled trial. *Journal of the American Medical Informatics Association* 2013;20(3):526-34.
91. Tildesley HD, Mazanderani AB, Chan JHM, et al. Efficacy of A1C reduction using internet intervention in patients with type 2 diabetes treated with insulin. *Canadian Journal of Diabetes* 2011;35(3):250-53.
92. Thom DH, Ghorob A, Hessler D, et al. Impact of Peer Health Coaching on Glycemic Control in Low-Income Patients With Diabetes: A Randomized Controlled Trial. *Annals of Family Medicine* 2013;11(2):137-44.
93. Tjam EY, Sherifali D, Steinacher N, et al. Physiological outcomes of an Internet disease management program vs. In-person counselling: A randomized, controlled trial. *Canadian Journal of Diabetes* 2006;30(4):397-405.
94. Wakefield BJ, Holman JE, Ray A, et al. Effectiveness of home telehealth in comorbid diabetes and hypertension: a randomized, controlled trial. *Telemedicine journal and e-health* 2011;17(4):254-61.
95. Waki K, Fujita H, Uchimura Y, et al. DialBetics: A Novel Smartphone-based Self-management Support System for Type 2 Diabetes Patients. *Journal of Diabetes Science and Technology* 2014;8(2):209-15.
96. Walker EA, Shmukler C, Ullman R, et al. Results of a successful telephonic intervention to improve diabetes control in urban adults: A randomized trial. *Diabetes Care* 2011;34(1):2-7.
97. Wayne N, Perez DF, Kaplan DM, et al. Health Coaching Reduces HbA1c in Type 2 Diabetic Patients From a Lower-Socioeconomic Status Community: A Randomized Controlled Trial. *Journal of medical Internet research* 2015;17(10):e224.
98. Whitlock W, Brown A, Moore K, et al. Telemedicine improved diabetic management. *Military medicine* 2000;165(8):579.
99. Whittemore R, Melkus GD, Sullivan A, et al. A nurse-coaching intervention for women with type 2 diabetes. *Diabetes Educator* 2004;30(5):795-804.
100. Williams ED, Bird D, Forbes AW, et al. Randomised controlled trial of an automated, interactive telephone intervention (TLC Diabetes) to improve type 2 diabetes management: baseline findings and six-month outcomes. *BMC public health* 2012;12

101. Wolever RQ, Dreusicke M, Fikkan J, et al. Integrative health coaching for patients with type 2 diabetes: A randomized clinical trial. *Diabetes Educator* 2010;36(4):629-39.
102. Wong FK, Mok MP, Chan T, et al. Nurse follow-up of patients with diabetes: randomized controlled trial. *J Adv Nurs* 2005;50(4):391-402.
103. Yoo HJ, Park MS, Kim TN, et al. A Ubiquitous Chronic Disease Care system using cellular phones and the internet. *Diabetic Medicine* 2009;26(6):628-35.
104. Yoon KH, Kim HS. A short message service by cellular phone in type 2 diabetic patients for 12 months. *Diabetes Research and Clinical Practice* 2008;79(2):256-61.
105. Young RJ, Burns E, Taylor J, et al. Pro-active call center treatment support (PACCTS) to improve glucose control in type 2 diabetes - A randomized controlled trial. *Diabetes Care* 2005;28(2):278-82.
106. Zhou P, Xu L, Liu X, et al. Web-based telemedicine for management of type 2 diabetes through glucose uploads: a randomized controlled trial. *International Journal of Clinical and Experimental Pathology* 2014;7(12):8848-54.
107. Zolfaghari M, Mousavifar SA, Haghani H. Mobile phone text messaging and Telephone follow-up in type 2 diabetic patients for 3 months: A comparative study. *Journal of Diabetes and Metabolic Disorders* 2012;11(1).
